# Supplementary material for: Study of the dynamic changes in the chemical constituents of Soapberry (Sapindus mukorossi Gaertn.) pericarp during fruit development by a non-targeted metabolomics approach
Source: Research Square preprint supplement (doi:10.21203/rs.3.rs-148385/v1), 2021-01-20
Supplement: Supplementary file 2 [file 7726ec2641518c51d639d089.xlsx]

## Sheet: Sheet1
		Names	Molecular Formula	Monoisotopic mass/Da	Molecular Weight/(g/mol)	RT [min]	QC1	QC2	QC3	QC4	QC5	QC6	S1-1	S1-2	S1-3	S2-1	S2-2	S2-3	S3-1	S3-2	S3-3	S4-1	S4-2	S4-3	S5-1	S5-2	S5-3	S6-1	S6-2	S6-3	S7-1	S7-2	S7-3	S8-1	S8-2	S8-3
C18_neg	1	Quercitrin	C21H20O11	448.101	448.102	7.491	9189.97	6719.89	11131.4	9927.64	9283.37	8887.53	33945.4	23713.6	44177.1	953.475	1895.84	474.565	1238.83	7320.78	4279.8	55938.4	16596.5	95280.2	1300.2	1116.12	932.043	913.942	1424.33	403.558	230.858	62.9611	89.5364	1488.13	867.16	246.195
	2	Protocatechuic acid	C7H6O4	154.027	154.026	6.015	11799.3	8822.09	15025.6	11866	11266.6	12016.5	74413.9	68489.8	80338	1150.68	1607.6	693.764	2172.1	8502.63	1021.95	6834.67	8225.2	1178.76	3944.95	5264.49	6584.04	1629.08	2377.67	880.49	6856.33	5491.8	4127.28	9633.56	6173.17	5041.85
	3	Leucodelphinidin	C15H14O8	322.069	322.07	6.613	5125.01	3931.94	5999.29	5306.66	5554.97	4832.19	1779.28	1657.84	1536.4	199.805	152.244	139.774	633.33	609.604	585.877	122.183	103.276	467.915	594.845	329.376	196.319	564.913	431.446	698.38	77.0226	79.5992	74.446	92503.4	59431.1	26358.7
	4	L-2-succinylamino-6-oxoheptanedioic acid	C11H15NO8	289.08	289.08	1.776	6812.86	6604.28	8473.43	5336.47	5928.15	7721.95	373.969	432.176	363.861	147.434	172.851	122.017	2316.93	984.998	1650.96	85.2794	879.549	482.414	13391.6	1553.19	7472.42	3607.29	6923.28	291.3	81.9051	83.0815	80.7287	1407.03	1599.83	1214.22
	5	L-(+)-tartaric acid	C4H6O6	150.016	150.016	1.164	4.1696e+06	3.45856e+06	4.70998e+06	4.39269e+06	4.23886e+06	4.04793e+06	4.64344e+06	6.57299e+06	8.96233e+06	222265	403677	40852.5	3.40212e+06	4.36019e+06	5.87679e+06	4.23545e+06	4.61604e+06	3.85486e+06	2.61243e+06	4.96999e+06	4.11785e+06	2.94842e+06	3.42323e+06	2.47361e+06	40534.9	48326.4	32743.5	2.87837e+06	5.15941e+06	3.6276e+06
	6	Haplopine	C13H11NO4	245.069	245.069	6.82	7679.79	6221.77	7680.88	9300.77	8077.83	7117.7	126.183	119.622	113.061	67.8683	71.8472	63.8893	1112.79	938.498	764.205	955.376	1307.24	603.512	128.745	139.483	134.114	9166.16	10668.4	7663.95	82.1347	77.9646	86.3048	4931.37	2858.19	785.023
	7	Glucose 1-phosphate	C6H13O9P	260.03	260.03	1.022	44461.6	30842.3	53285.8	47813.3	49141.9	41224.9	142019	95114.9	65688.7	395.59	717.069	74.1109	31905	19338.1	27993.2	18238.6	25287.9	11189.2	27813.8	20551.9	24182.9	23854.3	20920	26788.6	1337.65	445.122	2230.18	8917.35	8458.36	9376.33
	8	Furamizole	C12H8N4O5	288.049	288.049	1.75	99002.6	137487	13040.7	87689.2	131013	125783	201.085	363.731	433.501	114.027	148.431	79.6226	5166.16	3652.77	4409.47	1286.91	1384.35	7201.41	19478.1	9117.52	6370.92	5481.43	5495.18	5467.68	133.971	119.067	148.875	13221.8	17904.5	8539.1
	9	Dodecanedioic acid	C12H22O4	230.152	230.152	17.993	13807.3	9653.58	15981	15288.2	14077.8	14036.1	9578.98	11794.5	8698.61	6099.72	6505.19	10033.4	2637.93	2774.85	2293.19	2988.49	2437.76	3539.22	3409.19	3650.46	6606.94	4688.09	2764.74	6611.44	18308.5	12760.1	23857	9830.03	34866	59902
	10	DL-histidine	C6H9N3O2	155.069	155.069	1.076	20099.3	17614.5	22698.7	20145.2	19874	20164.2	38081.9	16364.6	18971.3	13412.7	4892.55	9152.62	8649.76	7717.52	11380.2	27518.6	43969.1	11068	13331	14916.8	11745.2	14097.5	15487.4	12707.6	105.417	82.831	128.004	31300.2	44806.7	12276.7
	11	Citreoisocoumarin	C14H14O6	278.079	278.08	6.11	8397.43	6439.26	9971.6	8871.69	8538.94	8165.64	673.021	468.783	570.902	646.984	1974.37	1310.67	417.727	185.237	266.387	331.306	359.18	303.431	398.407	202.517	101.956	512.955	259.843	766.066	250.195	136.706	363.685	95905.8	69054.8	42203.7
	12	4-Hydroxy-2-oxoglutaric acid	C5H6O6	162.016	162.016	1.356	160452	122844	181162	180009	167610	150633	6234.39	6756.37	6495.38	845.84	1358.53	333.152	75383.1	63748.1	69565.6	91867.1	52287.5	131447	32267.3	53490.1	11044.4	87401.3	106158	68644.8	2086.53	2279.6	1893.46	144557	103634	124095
	13	3-Hydroxy-L-glutamic acid	C5H9NO5	163.048	163.047	1.213	26869.7	20838.2	30678.3	29029.2	28319	25483.6	206518	296136	216476	621.013	692.506	549.52	11513.7	17953.1	43807.5	18258.9	16365	20152.8	8304.47	18004.2	12572.9	9077.66	8184.89	9970.43	152.541	134.154	170.927	10589.5	17231	9235.03
	14	3-Hydroxy-3-(methoxycarbonyl)pentanedioic acid	C7H10O7	206.043	206.042	1.306	649681	457698	769695	771822	610671	638516	756582	706806	806357	2895.57	4670.15	1120.99	20685.8	187150	421029	399738	347839	451637	505478	235836	397344	356244	428612	283877	431283	227913	24541.8	1.02844e+06	662056	722051
	15	1-O-acetyl-alpha-maltose	C14H24O12	384.127	384.127	1.603	38415	27791.9	44435.4	55112	37116.3	27619.6	72499.9	50462.1	28828.7	44142.9	21014.6	21948.3	16133	16887	15378.9	38877	20590.6	42224.4	61421.2	27336.2	44378.7	25622.7	75210.5	50416.6	27074.9	15810.7	38339.1	1.46916e+06	1.0523e+06	1.26073e+06
	16	1-Methyl-1,2,3,4-tetrahydro-beta-carboline-3-carboxylic acid	C13H14N2O2	230.106	230.106	6.62	6041.44	4544.13	6935.86	6990.2	5869.37	5867.64	241.878	267.198	216.557	86.3795	89.2261	83.5329	116.557	99.836	133.277	93.4787	333.601	123.97	987.159	148.912	543.45	1750.63	1812.24	1689.02	439.675	112.72	766.63	32196.8	14363.3	77146.5
	17	3-Dehydroquinic acid	C7H10O6	190.048	190.047	1.806	583157	741037	30923.3	735582	647200	761043	12466	13264	6157.58	806.095	969.585	642.605	42395	31592.8	20790.6	15222.5	14094	16350.9	60650	15015.4	32322.8	36544.2	33686.6	39401.8	804.226	647.328	961.123	40426.2	34255.8	29988.2
	18	1,1-Diethyl-3-oxo-2-triazanolate	C4H10N3O2-	132.078	132.078	6.902	19120.5	15767.5	22991.4	19933.9	16943.9	19965.5	5059.51	2249.32	1839.84	2326.47	1119.68	1352.69	565.545	1557.57	1061.56	1268.89	1410.01	1127.76	508.551	581.849	545.2	1387.46	1344.99	1366.22	847.959	544.326	1151.59	105552	113171	120790
	19	Uridine-5'-diphosphate-glucose	C15H24N2O17P2	566.055	566.055	1.224	29786	34723.9	24022.3	30224.6	30597.4	29361.6	207230	164704	159633	4339.64	8356.15	323.143	25995.6	47207	36601.3	38664	37928.9	39399.2	47960	44763.2	46361.6	25686	25244.3	26127.6	72.7263	78.2155	67.2371	851.951	2485.04	1238.7
HILIC_pos	1	(+)-7-epi-12-hydroxyjasmonoyl-L-isoleucine	C18H29NO5	339.205	339.205	2.214	15768.8	14255.5	13370	13546.9	14756.7	12996.7	106745	122069	99667.1	7452.71	5356.46	1448.37	1214.11	897.853	1530.37	3921.71	1252.16	5640.98	921.821	1118.83	724.811	3523.23	1631.07	1608.62	2653.85	1050.23	2545.53	2869.71	3709.96	3171.33
	2	(Z)-12,13-dihydroxyoctadec-9-enoic acid	C18H34O4	314.246	314.246	1.785	370499	325791	348598	365128	55406.7	59291.2	134871	155638	81883	182463	75730.6	110706	31042	32568.4	29515.6	23441.9	14201.9	32681.9	9744.01	16269	3219.02	71512.9	49337.5	60425.2	45599.3	17129	74069.6	99229.7	133101	65358
	3	(11S,12E,14Z)-11-Hydroxy-12,14-icosadienoic acid	C20H36O3	324.266	324.266	1.358	5304.96	5669.11	4718.68	8489.38	3799.26	3848.39	44468.4	97290.8	70879.6	2609.32	5301.02	2400.7	2547.69	3706.56	1621.74	3061.32	4050.63	2072.02	6291.39	2952.51	2567.3	3335.46	4331.41	2638.56	5095.46	2330.26	9553.69	9738.28	10145.2	10552.2
	4	(15Z)-9,12,13-Trihydroxy-15-octadecenoic acid	C18H34O5	330.241	330.241	2.291	1.65089e+06	1.67608e+06	2.75771e+06	1.56785e+06	2.2169e+06	2.16278e+06	1.12492e+06	3.32124e+06	2.22308e+06	5857.21	8121.03	3593.4	978.538	1294.2	662.871	1084.39	405.587	1763.2	504.68	665.667	343.694	2341.87	3870.4	813.333	4411.98	4325.82	4498.13	2536.09	861.828	4210.35
	5	N-(1-Deoxy-1-fructosyl)threonine	C10H19NO8	281.111	281.111	8.354	11245.9	8212.11	7727.98	10585.2	61735.8	79524.2	5031.04	5476.26	5253.65	4915.39	10237.4	17420.6	22925.6	13477.3	32373.8	31031.3	17784.5	44278.1	5057.98	34107.7	4288.02	1867.33	50195.6	91479.8	38942.1	45087.1	32797.1	58173.5	73259.6	65716.6
	6	N-(1-Deoxy-1-fructosyl)valine	C11H21NO7	279.132	279.132	7.467	7835.86	6461.59	6045.57	7327.69	6253.58	6686.63	1143.83	980.193	1062.01	1984.38	6443.81	9562.67	6546.29	6120.74	6971.83	6020.42	4914.16	7126.69	3014.56	5078.74	3632.35	3232.89	3034.72	3431.06	6291.09	7657.49	4924.69	48106.1	11487.7	29796.9
	7	N-(1-Deoxy-1-fructosyl)leucine	C12H23NO7	293.147	293.148	6.817	16547.1	13477.4	13169	12620	13323.2	12894.5	3184.35	662.111	1923.23	4808.71	7116.52	5962.61	12487	5538.9	19435	14405.7	10354.1	18457.4	5811.38	4802.43	3793.47	1268.23	4021.91	6775.6	10430.4	7934.17	12926.6	68472.3	25257.5	46864.9
	8	(9Z,12Z)-6,8-Dihydroxy-9,12-octadecadienoic acid	C18H32O4	312.23	312.23	1.657	2.36381e+06	1.8677e+06	1.94826e+06	1.99141e+06	1.7231e+06	1.70031e+06	3.86057e+06	7.33451e+06	4.56967e+06	3.82926e+06	2.46129e+06	1.70453e+06	2.25706e+06	2.19185e+06	2.22445e+06	1.3554e+06	1.32737e+06	1.38343e+06	2.41348e+06	1.03677e+06	1.72512e+06	1.23436e+06	2.29008e+06	1.76222e+06	682882	205320	444101	1.74835e+06	2.82935e+06	1.42481e+06
	9	α-Aminoadipic acid	C6H11NO4	161.069	161.069	5.641	167261	123308	132023	146937	225992	273242	317871	315264	767320	342184	303869	862627	45357.1	108938	77147.7	111348	78376.3	144320	253926	112445	183186	54524.1	47279.4	39038.4	55877.3	35187.1	34540	32320.5	35332	30208.9
	10	g-L-Glutamyl-L-pipecolic acid	C11H18N2O5	258.122	258.122	3.223	13220.4	17262.4	15055.2	14923	16158.8	14989.1	7242.49	6639.25	6940.87	12380.4	9660.64	215501	5699.74	12293.2	18886.6	18932.5	12712.6	25152.5	10587.3	3940.01	3675.83	5190.97	17366.2	9926.25	7406.78	5405.63	13190.9	11905.9	10202.1	10792.7
	11	1-[(3-Carboxypropyl)amino]-1-deoxy-beta-D-fructofuranose	C10H19NO7	265.116	265.116	8.916	31826.8	33444.7	34837.9	31070.9	34141.3	32954.4	8530.48	9483.29	9006.88	38139.5	416727	227433	461329	202650	720007	1.52123e+06	501692	2.54077e+06	40009.5	164398	288786	6864.02	284908	562953	354562	263316	445809	104663	1.06535e+06	585006
	12	1-Stearoyl-sn-glycero-3-phosphoethanolamine	C23H48NO7P	481.317	481.317	2.214	26553.7	24490.5	21703.4	31842.2	15092.9	44176.5	8798.52	14313.8	11556.2	8694.14	18024.4	13359.3	8333.54	7891.46	7449.38	26621.1	33569.5	19672.6	3527.93	2032.86	537.787	23769.3	28577.1	18961.5	47141.8	34809.2	74547.3	18217.5	57360.2	38616.5
	13	Eupatolitin 3-O-glucoside	C23H24O13	508.122	508.122	5.494	46932.4	36430.3	31666.8	56496.4	41171	43691.2	4532	2114.8	6949.19	36603	11628.6	24115.8	3917.31	4764.33	3070.28	5151.3	6671.94	3630.67	2201.1	3663.94	738.265	14850.5	19222.5	6793.2	2807.11	3722	1892.23	6891.25	6284.69	2197.37
	14	Genipinic Acid	C11H14O6	242.079	242.079	1.941	9628.92	8523.98	7617.42	17823.1	11887.3	9291.93	3569.81	2119.17	1063.27	5097.34	3080.3	3711.44	5845.34	2142.41	3993.88	1691.14	655.533	2726.74	7959.38	4329.05	2375.93	3883.26	6507.54	9131.81	9183.76	13863.7	18543.6	32121	42890.8	26394.5
	15	α-Tocopherol quinone	C29H50O3	446.376	446.376	1.254	7443.4	7011.01	11508.2	7121.13	9259.62	9314.69	11462.3	7280.85	9371.59	36141.5	33398.8	38884.2	65401.3	60732.2	70070.4	75016.2	92631.9	57400.5	11624.4	35124.2	17771.9	155252	177592	132913	25396.3	60052.9	42724.6	125728	132496	118961
	16	S-(1,2-Dicarboxyethyl)cysteine	C7H11NO6S	237.031	237.031	10.563	11917	11736.3	11338.2	12511.1	11537.2	11924.7	6434.14	9987.04	17487.7	6173.94	11830.8	3312.48	31834	39674.9	23993	55077.4	94555.5	15599.3	8182.92	4540.37	897.816	10794.9	7708.89	4622.84	4553.36	4331.63	4109.91	22765.9	24445.2	18059.7
	17	Glycerophosphatidylethanolamine	C5H14NO6P	215.056	215.056	8.885	13140.1	11538	10742.7	12996.2	11140.4	11869.5	23758.4	43057.5	76860.1	43729.1	52063.6	35394.7	6554.9	16694.5	26834.1	59098.3	68438.1	49758.6	2396.48	3447.29	4498.1	5809.55	9052.96	10141.2	20224.7	23891.2	16558.3	32688.8	27942.6	37435.1
	18	N-acetyl-alpha-fucosamine	C8H15NO5	205.095	205.095	7.305	344036	295019	297214	338924	184834	237688	293673	396650	198706	69698.1	37911.9	60202.4	92062.8	96396.8	87728.9	144649	172602	116696	227614	96966.6	162290	85528.4	116448	54609	58998.7	72465.3	45532	69583.3	33322.4	105844
	19	2-Acetamido-2-deoxy-D-glucono-1,5-lactone	C8H13NO6	219.074	219.074	8.466	26001.6	27032.6	25881.4	29001.8	26457	27441.6	6928.63	7290.8	7109.72	59614.6	49571.8	69657.3	108142	96858.9	119424	225612	153349	297874	25911.3	17965.1	10018.9	195529	242354	148704	163111	152216	174006	55820.6	342843	199332
	20	2-Acetamido-2-deoxyglucose	C8H15NO6	221.09	221.09	7.767	16555.1	14206.9	14433.8	21320.3	16629	16629	4506.53	2403.98	3455.26	9521.84	14989.4	36998.4	20160.9	51588.4	67909.7	60705.5	60056.2	61354.9	24905	39811.4	32358.2	30506.7	25471.5	19372	12864.5	31853.4	23391.3	35728.4	17454	48533.7
	21	2-Acrylamido-2-methyl-1-propane sulfonic acid	C7H13NO4S	207.057	207.056	6.877	16339.9	13561.7	15088.8	15671.5	14325.2	15380.2	7537.74	8162.22	7849.98	17553.4	34426.8	25096.9	4282.41	5368.2	6453.99	18985.9	24468.3	13503.4	8392.38	14402.6	11397.5	2991.37	4411.66	5831.95	1136.46	3128.34	2132.4	15251.8	7752.43	11502.1
	22	2-Amino-2,3,7-trideoxy-D-lyxo-hept-6-ulosonic acid	C7H13NO5	191.079	191.079	8.051	40199	38752.1	33185.5	43948.1	35968.8	38566.8	78238	51912.5	65075.3	359150	237953	480347	407706	118513	696898	218341	92898.6	343783	56109.5	32398.7	8687.94	170807	105750	235863	254485	166810	342160	504758	405862	603655
	23	3-(Butylsulfinyl)-L-alanin	C7H15NO3S	193.077	193.077	6.829	26370.9	21361.7	21319.2	17351.7	44312.5	39452.5	898.361	1360.25	1980.02	1641.25	1342.78	1722.26	1561.32	1663.77	2008.82	1788.23	1927.63	1885.96	1729.49	2033.33	1791.13	1077.54	2113.46	1595.5	120346	111432	129260	94191.6	103722	84661.1
	24	Sinensin	C21H22O11	450.116	450.116	8.154	85848.1	55477.6	72745.1	95355.9	81950.5	82741.6	236728	390654	210164	150888	180526	116342	60630	56164	50900.6	39631.9	43523.9	35739.8	77496.3	20850.4	49173.4	55706.2	37347.4	22486.7	60780.5	12781.5	16818.1	25017.4	25282.9	15707.9
	25	3-Hydroxy-3,5,5-trimethyl-4-(3-oxo-1-buten-1-ylidene)cyclohexyl β-D-glucopyranoside	C19H30O8	386.194	386.194	2.387	75301.4	66202.3	62412.6	44934	35231.5	30465.1	97293.4	713505	405399	69815	237607	22915.3	73504	134541	104022	133894	133583	134205	97952.9	107344	102648	75843.8	111615	46777.5	81109.3	57628	34146.7	72454.4	67595.9	77313
	26	4-Methoxybenzaldehyde N-[6-(tert-butyl)thieno[3,2-d]pyrimidin-4-yl]hydrazone	C18H20N4OS	340.136	340.137	6.704	331206	295250	273097	293383	284174	283240	68433.7	13549.6	29742	38180.7	64033.3	150016	94711.5	115710	73712.7	1.0576e+06	1.66141e+06	453788	75557.2	126846	101202	679052	576889	474726	1.83311e+06	1.12727e+06	421438	1.59074e+06	2.03109e+06	1.15039e+06
	27	4-Pyridoxic acid	C8H9NO4	183.053	183.053	2.216	156107	149518	162243	136060	155880	149152	118377	125119	121748	5161.75	6261.2	4062.3	4751.1	6715.85	2786.34	12771.4	8254.91	17287.8	97850	8813.57	53331.8	11536.9	14993.4	8080.49	11719.2	12014.5	11423.9	16342.5	19629.8	13055.2
	28	5,7-Dihydroxy-4-methylcoumarin	C10H8O4	192.042	192.042	1.817	310825	316744	305347	336035	311046	320691	104913	178125	141519	8027.8	9926.53	6129.08	12965.4	13040.5	12890.2	23271.2	41476.6	5065.82	641851	32191.5	337021	55113.2	70059.4	40167	12355.5	17400.8	7310.23	66766.7	17617.1	115916
	29	5'-O-beta-D-Glucosylpyridoxine	C14H21NO8	331.127	331.127	6.7	19908.1	16473.3	16618.5	15940.7	29272.9	31180.9	685.614	636.138	660.876	1516.96	1950.23	3537.14	6997.35	4770.94	2544.52	27445	23117	31773	13429.9	26262.4	19846.1	13985	61813.6	12368.7	18341.1	33326.9	25834	28109.8	36841.6	11865.4
	30	8-Hydroxy-deoxyguanosine	C10H13N5O5	283.092	283.092	7.299	24634.2	23222.2	20052.7	21445.5	21637.5	20749.1	29326.7	75234.8	52280.7	122147	113279	131016	389399	653628	125170	246209	399492	92926.4	4651.37	3581.68	2511.99	35346.3	30088.5	40604	18405.6	13074.7	15740.2	218964	262535	175392
	31	8-Hydroxyhexadecanedioic acid	C16H30O5	302.209	302.209	2.277	219472	214476	223114	228098	218795	225606	1.97826e+06	1.60358e+06	1.22891e+06	525820	424161	423378	56010.7	18874.9	11310.8	11004.3	8196.25	13812.3	80235.8	8312.17	1807.79	92059	64130	10922.2	41675.5	32016	51334.9	73156	70931.4	114416
	32	Acetylarginine	C8H16N4O3	216.122	216.122	8.513	11834.4	9892.71	9355.76	6125.1	9624.23	7740.43	523.371	625.201	574.286	44357.4	60093.8	28621	72982.4	104697	41267.9	208578	208974	208181	216308	144927	15544.9	168505	179076	157935	1.19946e+06	1.71376e+06	685150	2.25833e+06	3.79819e+06	718477
	33	Adenosine	C10H13N5O4	267.097	267.097	5.085	211230	210852	233786	207619	222319	220703	1.13381e+06	1.43423e+06	1.28402e+06	7.58281e+06	6.99246e+06	8.17315e+06	6.46835e+06	7.98327e+06	4.95342e+06	5.5224e+06	6.91743e+06	4.12738e+06	735019	389212	43404.8	506957	477141	447325	112641	407635	260138	1.23021e+06	974101	1.48633e+06
	34	Agnuside	C22H26O11	466.148	466.147	5.841	91694.3	80776.3	69005.6	85340.8	52444.2	55378.3	157759	105799	131779	35397.4	24829.5	45965.3	37622.6	27642.8	47602.4	25188.5	13345.8	37031.2	21048.3	42451.3	13137.8	146607	201818	174212	44273.5	38818.9	49728.2	73024.2	44490	37462.9
	35	Anticapsin	C9H13NO4	199.084	199.084	2.185	27978.4	23750.2	28060.7	15555.1	34143.8	28082.8	7760.69	9896.55	8828.62	49241.5	43043.1	72002	39585.8	28257	33921.4	27519.5	23639	31399.9	34591	16534.1	25562.5	31047.6	82726.1	37582.8	28696.6	57954.6	42805.3	32609.2	43528.4	54447.5
	36	Argininosuccinic acid	C10H18N4O6	290.123	290.123	9.217	12020.1	10372.1	10548.7	11563	10460.4	11055.8	7544.79	3306.84	5425.82	229864	203105	256622	652030	492629	811431	546576	437181	655972	3200.11	4085.25	4970.4	265344	356291	174398	279972	481615	78329.3	2413.47	91765.5	181117
	37	Ascorbyl glucoside	C12H18O11	338.085	338.085	8.972	654583	584094	560143	827585	470541	474985	156886	194910	177884	266720	175306	161621	293920	267544	207321	316406	416021	216791	387058	224659	305858	342422	285343	228264	858551	596682	206180	714395	198197	454308
	38	2-[(2-Amino-3-carboxypropanoyl)amino]-4-methylpentanoic acid	C10H18N2O5	246.122	246.122	8.43	57020	40014.6	37247.4	42089.4	73776.3	88735.4	21249.3	23697.3	30025.8	57647.6	65683.1	46950.1	43576.8	107022	30688.7	152119	250682	53555.9	47299.9	182601	114950	29180.8	147997	14727.1	35569.7	20490	50649.4	100697	102269	292253
	39	Azidamfenicol	C11H13N5O5	295.092	295.09	9.539	18687.2	19239.9	19674.9	24535.6	19457.4	22105.3	2922.15	2701.36	2811.75	7526.32	6769.31	11576.9	2565.15	9755.64	6160.4	15452.7	9447.9	21457.4	8313.28	14605.1	11459.2	17185.8	18799.5	15572.1	10162.4	14289.1	6035.77	121008	306025	491042
	40	Betulin	C30H50O2	442.381	442.381	1.252	60207.4	66149.9	67423.5	83636	66786.7	75529.8	21537.6	62224.9	41881.2	393275	305409	481141	940558	768024	1.11309e+06	894736	1.02058e+06	768895	44336.6	65974.5	87612.5	32024.8	238696	445368	105121	636705	558580	107478	285920	464363
	41	(10E,15Z)-9,12,13-Trihydroxy-10,15-octadecadienoic acid	C18H32O5	328.225	328.225	2.21	6.82505e+06	88245.8	4.75269e+06	6.22324e+06	2.42047e+06	5.48796e+06	211865	483704	347785	214801	4226.14	4108.59	1727.67	2671.18	784.152	1420.07	2084.08	756.058	739.025	947.283	530.766	3284.87	4793.91	1775.83	23763.8	9552.93	37974.6	47581.1	61625.9	33536.3
	42	Cytidine	C9H13N3O5	243.086	243.086	6.804	51579.8	42426.5	41147.5	38214.1	41787	39680.8	16501.5	42795.8	29648.6	502571	471470	533671	446713	662695	230731	380584	504904	256265	17530.8	10329.9	3129.05	12104.9	15987	19869.1	103978	16600.3	191357	809889	597102	1.02268e+06
	43	D-(+)-Tryptophan	C11H12N2O2	204.09	204.089	6.894	192147	153249	156286	150051	154768	153169	345045	140628	242837	143342	192688	194357	150136	164306	135966	384778	668946	100609	63783.3	168282	116032	280527	341315	219740	108518	349836	463094	156502	289923	768757
	44	Dammarenediol-II	C30H52O2	444.397	444.397	1.254	49878.8	49770.2	51140	72228.4	50455.1	61684.2	19807.5	13572.6	16690.1	2254.66	2577.93	1931.39	3907.09	2029.97	5784.21	3683.25	4078.45	3288.06	1052.35	1404.67	700.024	5538.05	8175.54	2900.56	3568.5	2932.59	4204.42	9765.65	14571.4	4959.88
	45	Edotecarin	C29H28N4O11	608.175	608.174	4.744	11785.8	10957.9	11686.9	10006.8	11322.4	10846.8	11454.9	6168.97	8811.93	5152.29	9226.98	16632	42437.7	19985.6	31211.6	62726.4	40201.5	85251.4	4219.99	7044.06	1395.92	84933.4	43601.9	2270.35	68496.6	22774.1	45635.4	135180	11521.3	73350.6
	46	Eglumetad	C8H11NO4	185.069	185.069	6.284	14403	12999.4	12226.6	13497.7	12613	12862.2	7355.06	14359.8	10857.4	47583.1	34081.1	61085.2	104338	107646	101030	98626.5	160201	37052.5	6674.21	5126.42	3578.64	74986.6	99403.3	50569.8	60069.3	82411.7	37726.9	3213.6	3372.68	3293.14
	47	Etilevodopa	C11H15NO4	225.1	225.1	2.369	5772.66	4486.73	5234.65	7436.84	4860.69	6335.75	1751.78	1074.75	1413.27	1003.57	1002.98	841.543	630.549	538.067	966.867	618.435	760.742	476.127	1680.46	484.78	448.273	710.973	926.348	2443.39	5850.75	4059.78	4955.26	2688.66	6056.89	9425.12
	48	Glycyl-L-leucine	C8H16N2O3	188.116	188.116	5.627	155538	132058	142259	171132	137158	156695	109457	116164	112811	126552	328202	312017	137247	460676	133228	536697	937639	135755	146820	504581	325700	130346	70848.5	11351.2	18604.2	21023.7	19813.9	329992	249139	475880
	49	Hexadecanedioic acid	C16H30O4	286.214	286.214	1.916	190304	202946	194958	172643	198952	183801	712765	380790	546777	1.23719e+06	1.02694e+06	1.44744e+06	89101.7	63270.4	77481.8	84950.4	30700.1	139201	176323	31244.3	103784	116810	71957	27104.1	311720	243466	175212	240152	227100	253203
	50	Jasmonic acid	C12H18O3	210.126	210.125	2.043	159924	163819	164903	152477	164361	158690	1.53399e+06	1.05129e+06	1.29264e+06	7936.82	10585.5	5288.1	2530.5	4109.71	951.291	2329.44	1478.71	3180.18	2248.39	1683.87	2812.9	16040.2	19670.4	12409.9	80344.4	69506.7	58668.9	44219.5	52886.8	19595.9
	51	L-(+)-Citrulline	C6H13N3O3	175.096	175.096	9	15667.8	14873	14053.3	13730.3	14463.1	13891.8	5674.88	11928.3	8801.6	672219	1.06732e+06	277120	579920	801932	357908	673665	1.10048e+06	246847	433476	829995	36957.9	477124	417812	536437	565192	854725	275659	833934	1.25951e+06	408356
	52	L-Leucyl-L-leucine	C12H24N2O3	244.179	244.179	2.284	73993.4	82101.6	78294.4	72840.7	80198	75567.5	51231.4	79751.5	65491.5	642488	501937	783040	88750.7	135305	181859	554599	818780	290417	92459.4	818399	455429	72596	45203.3	17810.6	171150	58913.6	283387	362252	355650	358951
	53	L-Leucyl-L-valine	C11H22N2O3	230.163	230.163	3.482	304346	271215	244904	187859	258059	216382	33901.6	144270	89085.9	3.43285e+06	3.30138e+06	3.56433e+06	3.00711e+06	4.49802e+06	1.5162e+06	3.95209e+06	6.04137e+06	1.86282e+06	288315	5.12308e+06	2.7057e+06	103241	105928	108616	28539	37048.7	32793.9	1.25187e+06	5.33996e+06	6.22475e+06
	54	L-Tyrosine	C9H11NO3	181.074	181.074	7.698	70143.3	81272.8	93351.2	54877.8	87312	74114.5	252479	126706	189592	277956	331598	224314	251416	331102	171731	355479	490369	220589	86851.7	53035.4	19219.1	40476.2	39610.4	38744.6	175927	202519	149335	157818	374093	448306
	55	Luteolin	C15H10O6	286.048	286.048	3.307	3.79349e+06	3.86931e+06	4.38617e+06	3.37981e+06	4.12774e+06	3.88299e+06	335691	194368	265029	9800.65	8691.86	10909.4	26942.1	40063.1	13821	129843	33409	226276	15127.1	18249.1	12005.1	732528	1.19221e+06	272842	85500.5	83307.1	87693.8	5.06167e+06	1.05142e+06	3.05654e+06
	56	Mebutamate	C10H20N2O4	232.142	232.142	5.447	32730.6	38675.1	49236.5	52147.6	43955.8	50692.1	41732.5	42869.3	42300.9	134903	153156	89775.8	54010.2	101700	43152.9	104445	144945	63945.5	42072.2	75925.5	58998.8	40486.5	107728	74107.3	1964.54	4150.87	3057.7	42890.7	57409.1	65965.2
	57	Meprobamate	C9H18N2O4	218.127	218.127	5.857	154549	143621	142080	123433	142851	132757	110519	160056	135288	179345	276522	260809	164022	388968	118898	319307	526468	112146	137221	295418	216320	135086	214960	175023	16020.4	15567	79473.2	318587	151395	269166
	58	Methyldopa	C10H13NO4	211.084	211.084	8.565	5381.52	5364.64	5276.95	10165.7	5320.8	7721.3	11034.1	68809.8	39921.9	6134.88	2274.38	2487.88	7101.19	5679.09	2147.14	19387.2	27779.3	10995.1	8435.32	4614.28	2840.1	5842.97	5212.3	4581.64	5465.76	7589.4	1803.46	8357.33	5251.41	2145.5
	59	DL-Alanyl-DL-leucine	C9H18N2O3	202.132	202.132	4.892	101851	151120	105766	113689	128443	109728	71774.5	94159.3	82966.9	323174	329768	316581	84018.8	104431	124843	319716	507774	131659	96953.9	434687	265820	75104.6	44360.9	13617.2	102246	17547	186946	289484	283741	407505
	60	2,3-Dinor-8-epi-prostaglandin F2alpha	C18H30O5	326.209	326.21	2.211	713414	758219	397727	532580	577973	465153	212207	34656.4	123431	233564	178731	123898	76637.2	62641.9	24687.2	220709	36502.3	404915	209202	31188.6	120195	11334.5	21742.6	32150.8	14827.7	68798.6	41813.1	434765	496696	558628
	61	Muramic acid	C9H17NO7	251.1	251.101	8.987	19211.5	17005.1	16729	18234	16867.1	17481.5	21723.4	28618.1	25170.7	15621	31380.5	45872.8	42121.3	42091.3	42151.3	75256.3	56496.6	94016	14594.3	40398.8	27496.5	37182.4	54331	20033.7	3546.19	29383.5	13251.5	18996.2	44282.9	31639.6
	62	N-(3-Carboxypropanoyl)-5-hydroxynorvaline	C9H15NO6	233.09	233.09	8.45	11617.3	12149.2	9695.17	24012.4	10922.2	16853.8	17443.3	25178	21310.6	130659	145557	115760	180987	136520	225455	634607	261764	1.00745e+06	99715.2	177338	22092.1	202338	265671	139006	130890	112808	148971	6350.28	234852	120601
	63	N2-Succinyl-L-glutamic acid 5-semialdehyde	C9H13NO6	231.074	231.074	2.336	2057.39	4241.44	5607.75	2507.94	4924.59	4057.84	15847.2	24571.1	20209.1	3675.58	2482.11	4869.05	8365.49	1326.93	5127.38	1702.52	1927.45	1477.59	1107.32	958.582	1256.06	9232.63	2144.54	8532.23	8050.93	3567.95	5809.44	15666.7	21818.7	27970.7
	64	N-Acetyl-DL-glutamic acid	C7H11NO5	189.064	189.063	9.179	952602	826586	804925	961486	815756	883205	109526	99545.9	104536	82015.5	18183.3	25772.4	53420	45036.2	41429.2	63910.2	73703.5	54117	192918	43803.8	118361	296918	208773	184612	471179	647739	279417	432168	352212	512125
	65	N-Acetyl-L-carnosine	C11H16N4O4	268.117	268.116	7.057	609619	497747	518749	527536	508248	523142	162683	135262	148973	207412	158875	122753	241877	338617	150818	603543	771734	435352	492550	289069	390809	803339	429250	55161.1	981194	680951	831073	186103	221696	150509
	66	N-Acetyl-L-glutamine	C7H12N2O4	188.08	188.08	7.59	214903	199775	193300	239844	196538	216572	15273.3	7467.63	11370.5	11879.3	12107.9	13246.8	13797.1	15427.5	12166.6	43368.2	43178.7	43557.6	15592.3	15002.6	4520.78	38655.5	114799	76727.2	133914	439455	744997	488376	902054	418757
	67	N-Acetylornithine	C7H14N2O3	174.1	174.1	7.928	163981	146897	135210	171344	141053	153277	596450	11610.3	304030	14978.1	6547.73	23408.5	4428.88	2998.18	5859.58	9532.62	15364.3	3700.94	28028	21856.7	24942.4	45843.8	49489.3	53134.9	59313.7	44668.6	30023.4	129116	113346	97576.3
	68	5'-N-Ethylcarboxamidoadenosine	C12H16N6O4	308.123	308.122	8.182	8513	7176.2	7047.74	8567.29	7111.97	7807.51	2170.12	1738.96	1954.54	2335.89	6917.97	8163.19	3221.5	5367.65	8622.56	15746.5	21504.1	9988.88	2392.68	32274.9	17333.8	2366.99	5663.94	9860.7	1057.23	3187.65	5318.07	18400.6	11905.8	24895.4
	69	N-glycoloyl-D-mannosaminolactone	C8H13NO7	235.069	235.069	1.955	8306.86	6970.05	8132.81	8900.66	7551.43	8516.73	152726	64213.6	108470	1492.12	5128.14	22523.8	1234.31	1420.1	1412.02	1673.31	1641.19	1705.42	1336.8	1258.03	1037.54	1196.27	2650.69	3013.41	1345.5	1550.92	3550.6	2235.75	3736.39	3640.32
	70	Nitrilotriacetic acid	C6H9NO6	191.043	191.043	9.705	30914.3	29761.2	29178.3	19605.3	29469.8	24391.8	95897.6	43683.9	69790.7	33065.9	126938	220809	191430	217295	165566	140747	189283	92210.1	14569.1	96338.3	55453.7	14366.3	65592.1	37229.9	7847.12	12079.7	16312.3	15413.8	49844.7	25461.6
	71	N-Undecanoylglycine	C13H25NO3	243.183	243.183	2.324	19462.7	17089.2	16467.8	17876	16778.5	17171.9	27662.4	23790.2	25726.3	18629.1	46042.7	27344.7	15212.6	10149.4	12251.6	11716.1	8750.16	14682	4203	3849.54	4556.46	20264.7	20280.5	20272.6	9364.01	8047.14	3607.89	11935.6	13670	15404.5
	72	Pantothenic acid	C9H17NO5	219.111	219.11	6.514	383926	323924	325017	404828	324471	364922	517709	447327	482518	204528	91429.7	191168	146915	75346.3	111130	148298	97054.8	199542	33757.2	64213.4	3300.87	198623	259223	120637	70863.4	49655.1	92071.8	339786	262834	101802
	73	Pinolenic acid	C18H30O2	278.225	278.225	1.675	275363	1.6552e+06	447805	1.00785e+06	1.0515e+06	727829	171663	106880	139271	667371	56648.2	73339.2	72399	72727.6	44048.8	75765.2	54139.3	97391	27454.6	53383.5	1525.65	148677	103244	125960	26523.6	7785.55	45261.8	2709.59	25258.4	47807.2
	74	Pre-acinetobactin	C16H18N4O5	346.128	346.126	2.264	162251	163939	132393	95989.7	148166	114192	577718	434162	505940	967179	1.11889e+06	815472	142218	494271	318244	83824.7	119701	47948.3	46110.8	89503.5	2718.08	30287.7	48520.7	12054.6	19737.4	23529.1	15945.8	25669	44065.5	7272.52
	75	Rutin	C27H30O16	610.153	610.154	8.315	1.68009e+06	1.71354e+06	1.66316e+06	2.02431e+06	1.68835e+06	1.84373e+06	6.55624e+06	9.90301e+06	8.22963e+06	3.23327e+06	4.89884e+06	1.56769e+06	4.19937e+06	2.38203e+06	2.25767e+06	2.48121e+06	2.12527e+06	2.83715e+06	245639	486211	5066.27	3.08263e+06	3.97418e+06	3.5284e+06	544937	262229	827644	2.75064e+06	1.58774e+06	2.16919e+06
	76	Sulfadimethoxine	C12H14N4O4S	310.074	310.074	2.027	2.10382e+06	2.04517e+06	2.0718e+06	2.74711e+06	2.05849e+06	2.40946e+06	2.26591e+06	1.67809e+06	1.972e+06	1.86351e+07	1.8193e+07	1.90772e+07	1.1463e+07	1.09136e+07	1.20125e+07	1.25565e+07	8.74333e+06	1.63697e+07	1.96106e+06	7.76285e+06	1.11202e+06	2.3711e+07	2.92081e+07	1.8214e+07	1.96957e+07	1.33001e+07	2.60913e+07	3.14078e+07	4.35906e+07	1.9225e+07
	77	Troxipide	C15H22N2O4	294.158	294.158	4.676	20247	23971.9	21844.4	28300.9	22908.2	25072.7	10744.9	16893.2	13819	77828.5	84120.5	71536.5	13715.4	69777.8	31360.2	86213.8	151545	20882.2	14938.4	64046.7	39492.5	10567.9	8096.73	5625.57	6358.65	6302.07	6330.36	146082	146320	145844
	78	Uridine monophosphate (UMP)	C9H13N2O9P	324.036	324.036	9.511	48124.3	47368	45165.6	55270.1	46266.8	50217.8	193422	160934	177178	78259.1	83023.9	52161	22307	29320.7	30263.4	22708.2	21357.9	24058.4	23013.5	9736.52	16375	16381.4	6762.6	3358.28	4470.43	5963.41	1595.09	2023.5	2615.07	2299.52
	79	Ursolic acid	C30H48O3	456.36	456.36	1.442	80568.2	90590.2	108903	106019	99746.8	107461	196658	297897	247277	45181	24912.3	65449.7	72726.5	36313.3	109140	110480	30013	190948	181076	105527	143301	341428	128000	234714	25828.9	33483.6	18174.2	131104	201455	166279
	80	2-[(2-Amino-3-methylbutanoyl)amino]-3-hydroxypropanoic acid	C8H16N2O4	204.111	204.111	6.545	37898	22932.7	19419.8	23495.9	21176.2	21457.8	21450.6	35026.8	28238.7	55793.3	44618.3	39788.5	27633.2	56647.1	15615.4	52537.4	88038.6	17036.2	24623.6	45203.1	34913.3	19875	30501.5	25188.2	1814.16	1534.76	1674.46	85339.8	23141.5	46539.1
	81	Valylvaline	C10H20N2O3	216.147	216.148	4.17	248444	242313	182270	178556	212291	180413	78109.3	131780	104945	1.44368e+06	1.66385e+06	1.22351e+06	258455	471818	685181	2.01514e+06	3.33021e+06	700081	196847	1.74715e+06	971997	125749	77175	28600.7	12815.2	60617.8	36716.5	2.14965e+06	1.51596e+06	2.78335e+06
	82	Vorinostat	C14H20N2O3	264.147	264.147	2.321	34474	35855.1	34785.7	40857.3	35320.4	37821.5	10880.6	9046.37	9963.49	54601.2	75108.5	34094	4760.18	12708.7	20657.2	78569.1	142052	15086.6	10909.9	50574.3	30742.1	2402.5	1538.49	674.484	2198.22	1330.58	3065.87	51057.3	34599.7	89618.2
	83	Zonampanel anhydrous	C13H9N5O6	331.055	331.054	8.147	668200	738956	615009	1.00628e+06	676983	810645	258766	204492	231629	322505	204106	440905	617147	228546	764185	463769	296936	630602	1.72176e+06	246349	984055	752180	590719	247440	189793	246881	132706	316663	455717	177609
	84	α,α-Trehalose	C12H22O11	342.116	342.116	8.683	2.49305e+08	2.1655e+08	2.14759e+08	2.37801e+08	2.15654e+08	2.2628e+08	4.7086e+07	6.37565e+07	5.54212e+07	9.29865e+07	1.14811e+08	1.36635e+08	1.65636e+08	1.52494e+08	1.39351e+08	9.23151e+07	8.47306e+07	9.98995e+07	1.85589e+08	1.23435e+08	1.61131e+07	2.02361e+08	1.90508e+08	2.06432e+08	2.46174e+08	1.29016e+08	2.03357e+08	1.99885e+08	1.69059e+08	2.07847e+08
	85	N-(β-Glucosyl)-(oxindol-3-yl)acetyl-aspartate	C20H22N2O11		468.138	9.424	202699	173275	214003	185078	193639	199540	8044.09	6131.96	7088.02	12958.6	15405.1	29881.8	87429.1	150098	91382.9	513448	533804	493092	66023.6	539766	302895	256523	368878	144168	215412	308727	122096	108183	20129.4	64156
	86	6-O-Benzoylphlorigidoside B	C26H32O14	568.179	568.179	7.829	50968.5	40622.7	45988.8	57829.8	43305.7	51909.3	721367	378413	549890	124505	164602	65339.1	19526.1	13511	7495.91	28157.7	40836.7	15478.8	18848.9	13317	16082.9	10723.8	15129.2	18157.2	6012.81	6490.05	14400.3	12922.4	10689.1	15155.7
	87	2-Acetamido-2,6-dideoxy-alpha-D-galactopyranose	C8H15NO5	205.095	205.095	7.834	32971.6	27367.7	31034.4	39940.9	29201.1	35487.7	214326	122957	168642	776660	597767	955552	5993.67	183960	94976.8	653481	306722	1.00024e+06	136974	675804	406389	9674.67	31667.2	53659.7	294733	268398	321068	371676	307713	435639
	88	1-(1-Deoxy-D-fructos-1-yl)-L-proline	C11H19NO7	277.116	277.116	7.733	23000.7	4131.57	6314.4	9783.43	5222.99	8048.91	2235.51	8315.04	5275.27	70751.2	71708.8	69793.6	91264	100265	82262.7	96802.3	121515	72089.7	2434.28	2281.5	2128.72	46959.8	56048.3	37871.2	45686.8	56542.6	34831	458715	111398	806032
HILIC_neg	1	α-Eleostearic acid	C18H30O2	278.225	278.225	1.393	2.20382e+07	2.83175e+07	2.56975e+07	3.12672e+07	2.51779e+07	2.84824e+07	7.92792e+06	9.28855e+06	8.60824e+06	6436.83	5812.66	7061	4922.82	3606.99	6238.65	1940.63	2451.23	1430.04	1615.72	831.838	2399.6	3735.54	4552.73	2918.35	6525.7	1538.53	11512.9	23646.4	37756.2	9536.59
	2	Sucrose	C12H22O11	342.116	342.116	8.688	2.42096e+08	2.46714e+08	2.57563e+08	2.29811e+08	2.44405e+08	2.43687e+08	4.47338e+07	5.94754e+07	5.21046e+07	1.43956e+08	1.37283e+08	1.3061e+08	1.57149e+08	1.43412e+08	1.29675e+08	7.77859e+07	6.57008e+07	8.98709e+07	2.0047e+07	5.1734e+06	3.49205e+07	2.11581e+08	1.91046e+08	1.9178e+08	2.37518e+08	1.92229e+08	1.84961e+08	1.86657e+08	1.25501e+08	2.38364e+08
	3	Ascorbic acid	C6H8O6	176.032	176.032	8.939	6.61404e+07	6.60082e+07	6.70287e+07	9.51407e+06	6.60743e+07	3.82714e+07	15322.5	4879.04	10100.8	32549.2	31661.4	33436.9	47209.6	52822.9	41596.2	68621.8	82838.8	54404.8	1070.47	590.527	1550.41	83567.1	125189	41945.6	109886	144381	75390.4	89628.2	58135.4	121121
	4	Allantoic acid	C4H8N4O4	176.055	176.055	9.236	442462	464461	521277	374826	453462	448052	828601	1.29488e+06	1.06174e+06	457243	278335	99426.4	42035.6	294922	547808	4.36135e+06	3.10101e+06	5.6217e+06	7919.04	9465.19	9819	23385.3	35214.6	47044	32480.4	30699.4	34261.4	1213.58	3503.6	5793.63
	5	Valylvaline			216.148	4.194	206446	236143	277781	230386	221295	254084	74831.2	134725	104778	1.51506e+06	1.5054e+06	1.52471e+06	288942	434405	579869	2.05269e+06	3.35656e+06	748831	40373.5	42194	38553	165261	100624	35986	11509	69683.8	40596.4	2.75584e+06	3.08334e+06	2.42834e+06
	6	Uridine monophosphate (UMP)			324.036	9.55	54430.3	57715.5	58398.5	42895.8	56072.9	50647.2	172615	141118	111673	69157.9	55673.2	35313.8	20628.4	16776.7	19098.3	17172.6	14021.7	20323.5	412.037	407.914	416.16	4282.09	6211.6	2352.57	4448.62	6624.63	5536.62	801.196	2448.89	1144.11
	7	Rutin			610.154	8.383	1.86057e+06	2.17314e+06	1.59862e+06	1.87359e+06	2.01686e+06	1.7361e+06	4.53585e+06	5.92685e+06	7.49083e+06	3.23222e+06	4.73738e+06	1.72705e+06	3.89651e+06	2.0997e+06	2.4479e+06	2.66241e+06	1.9891e+06	3.33572e+06	17169.4	1881.33	32457.4	3.80286e+06	3.67695e+06	3.73991e+06	634194	330943	964268	1.31907e+06	1.91983e+06	718311
	8	Pantothenic acid			219.11	6.535	318926	341179	366831	278195	330052	322513	416038	393561	225682	111525	74620.8	148429	150320	212863	275407	133376	71354.7	195397	3832.38	1027.26	6637.51	259989	259580	259784	179315	148931	118546	334953	282611	112384
	9	N-Acetylornithine			174.1	7.916	173376	179970	206559	151044	176673	178801	73634.5	9311.25	137958	37167.6	33045.6	41289.6	41715.5	37355.1	29013.5	60388.8	80764.2	40013.4	3204.43	1572.35	4836.5	57624.8	158625	259626	65466.8	154005	109736	120326	185420	717594
	10	N-Acetyl-L-glutamine			188.08	7.628	221180	238559	212106	182758	229870	197432	7006.5	7801.8	6211.21	4808.16	4317.98	5298.35	4343.49	6811.95	7207.98	14151.3	10507.4	17795.3	1385.91	1163.05	1608.77	43723.8	73840.7	58782.3	136786	422889	708991	406423	394005	381587
	11	N-Acetyl-DL-glutamic acid			189.063	9.246	914063	947926	1.00762e+06	790649	930995	899133	84705.4	85347.2	85026.3	25460.7	16263.3	34658	54912.3	31859.7	42937.7	70782.9	68966.5	72599.2	1956	1212.17	2699.82	364180	329929	190749	563297	969170	548043	668104	633463	702745
	12	DL-Alanyl-DL-leucine			202.132	4.912	83704	91829.8	97348.7	96221.3	87766.9	96785	72297	95288.5	83792.7	299239	321485	276993	88808	112607	136406	288012	441688	134336	21311.1	21527.9	21094.3	77705.9	46179.3	14652.8	186050	29035.3	343064	276139	426761	619335
	13	Methyl (1S,4aR,6S,7R,7aS)-1-(β-D-glucopyranosyloxy)-4a,7-dihydroxy-6-{[(2E)-3-(4-hydroxyphenyl)-2-propenoyl]oxy}-7-methyl-1,4a,5,6,7,7a-hexahydrocyclopenta[c]pyran-4-carboxylate			568.179	7.827	47278.8	52173.9	49604.2	41815.8	49726.4	45710	546114	311490	428802	122787	120504	121645	20504.6	21934.3	21219.4	14414.9	23783.5	5046.34	618.815	519.385	718.245	10654.8	11366.2	12077.6	4439.42	1908.68	8035.57	2740.14	2150.76	11305.1
	14	meprobamate			218.127	5.882	154073	174746	160639	143317	164410	151978	103929	143444	123687	163257	257189	238565	134720	348811	104768	248186	383757	112615	5740.17	5900.67	5579.67	141718	230152	185935	15697.8	28576.3	22137.1	300725	292234	393726
	15	Luteolin			286.048	3.398	1.27179e+06	1.39506e+06	1.70731e+06	2.26738e+06	1.33343e+06	1.98735e+06	279553	169527	224540	8779.06	8045.27	9512.86	22791.5	31203.6	14379.4	135928	33708.8	238147	18344.5	1108.08	35580.9	439221	572716	305726	60539.1	58564.1	62514	324925	608046	41804
	16	L-Tyrosine			181.074	7.688	90478.9	118568	95566.1	85628.1	104523	90597.1	252879	135123	194001	221460	238054	204866	60473.1	81663.6	102854	287265	401648	172882	22836.9	16138	29535.7	59663.2	42159.5	24655.9	180841	214035	147648	172477	462536	448492
	17	Leu-Val			230.163	3.436	373718	379063	282742	383530	376391	333136	113578	181791	147685	2.40768e+06	2.4891e+06	2.32627e+06	342764	895385	1.44801e+06	3.24194e+06	4.96982e+06	1.51406e+06	164422	157671	171172	327213	210232	93250.6	1.39505e+06	174303	2.61579e+06	1.11891e+06	8.57165e+06	6.23822e+06
	18	Leu-Leu			244.179	2.313	81577.6	87171.3	94802	98384.5	84374.5	96593.3	60579.7	97165.4	78872.5	756219	674989	837448	107389	153638	199888	635840	979925	291755	735.233	543.212	927.254	93762.4	57734.4	21706.3	279861	91867.5	467855	1.48857e+06	1.04256e+06	1.93459e+06
	19	Hexadecanedioic acid			286.214	1.921	122643	137915	129024	140241	130279	134633	653089	378634	515861	1.13773e+06	888673	1.38678e+06	102074	55505.6	74088.9	81310.1	27417	135203	6398.32	2146.73	10649.9	127354	177446	152400	98963	58662.1	139264	139848	134659	145037
	20	Gly-Leu			188.116	5.637	150304	149411	153413	142394	149857	147904	123304	140243	131774	142265	300193	273803	157424	142384	127343	388561	640289	136834	11067.1	11484	10650.1	141443	376637	259040	19055.2	30597.4	24826.3	367365	453345	710148
	21	DL-Tryptophan			204.089	6.859	172437	182896	191262	137390	177666	164326	340613	140390	240501	152186	190996	199464	103327	142242	124109	349635	579299	119970	7638.05	4144.35	11131.8	256818	317606	196030	117656	433801	498305	172528	267885	880346
	22	asp-leu			246.122	8.478	44258.2	46418.6	47111.6	40245.4	45338.4	43678.5	25475.1	19151.1	22313.1	99237.6	87593.1	110882	43972	48413.8	52855.6	183720	286595	80843.7	1381.21	1636.34	1126.09	30550.3	21504.2	12458.2	82720.7	21129.5	144312	312169	240087	384250
	23	Adenosine			267.097	5.092	235934	253238	267689	219839	244586	243764	1.06225e+06	1.60819e+06	1.33522e+06	6.79787e+06	6.75254e+06	6.84319e+06	5.67308e+06	6.71455e+06	4.63161e+06	4.9575e+06	5.70922e+06	4.20579e+06	89068.6	75042.4	103095	644973	553027	461082	140530	445406	292968	1.4981e+06	1.11528e+06	1.88092e+06
	24	Acetylarginine			216.123	8.527	15528.4	18353.9	19388.6	12367	16941.1	15877.8	1187.71	858.445	1023.08	93863.7	115991	71736.8	128751	174978	82523.9	384267	346647	421887	6885.36	1430.81	12339.9	361196	405668	316724	2.74287e+06	3.57207e+06	1.91368e+06	5.57769e+06	9.72173e+06	1.43364e+06
	25	8-Hydroxyhexadecanedioic acid			302.209	2.294	204290	202570	206190	201575	203430	203882	2.0309e+06	841730	1.43631e+06	661623	385794	473773	59076.2	16684.7	11152.3	10285	6882.45	13687.5	1621.17	1808.47	1433.87	25708	45965.8	5450.24	39054	23526.3	54581.7	89129.5	54908.7	72675.7
	26	5,7-Dihydroxy-4-methylcoumarin			192.042	1.843	165341	182834	204014	256648	174088	230331	72638.4	147157	109897	7520.27	8553.86	6486.69	13356.7	12653.1	14060.3	21952.3	38547.9	5356.75	1212.29	1285.92	1138.65	45516.5	50522	40511.1	10661.2	13538	7784.49	49058.7	14712.6	83404.8
	27	4-Pyridoxic acid			183.053	8.09	71427.5	73839.6	91751.4	62087.4	72633.5	76919.4	14111.2	10338.6	12224.9	13610.7	11057.1	9566.81	15083.5	21631	26670	64449.8	68117.1	60782.5	40501.6	31124.2	21746.7	190015	104170	275860	61282.9	130323	95802.9	154465	579677	453232
	28	2-Acetamido-2,6-dideoxy-alpha-D-galactopyranose			205.095	7.853	7487.09	6804.73	8250.11	7862.61	7145.91	8056.36	124557	65582	95069.4	376563	270647	482480	403700	97528.5	709872	598841	419882	777799	108777	87366.3	65955.4	328537	540100	116975	194454	206190	182719	808365	854606	762125
C18_neg	1	C14 H32 N5 O12 P			493.179	7.756	24611.9	17620.8	32066.4	24854.9	23459	25058.4	4918.55	3769.46	4344	221.223	351.479	90.9674	34989.5	43650.9	39320.2	55792.7	103578	8007.47	25309.5	14673.6	4037.68	147.898	3121.22	6094.53	132.459	172.404	92.5139	3726.52	1871.49	5581.55
	2	C24 H45 N2 O14 P			616.258	7.885	10878	7759.21	12948.5	12464	10669.9	10548.5	181.564	528.85	378.439	74.7898	78.9715	70.6081	97.3951	83.6702	77.4277	326.505	490.397	162.613	93.3689	151.285	322.867	80.3656	252.63	939.119	120.555	76.2055	164.905	381.268	3259.4	6137.52
	3	C26 H49 N2 O14 P			644.291	12.463	14416.7	10039.2	17871.9	15831.1	14334.7	14006.5	570.472	894.768	860.703	163.161	166.438	159.883	5274.37	3690.52	4482.45	11206.3	9299.71	13112.9	6121.27	6368.66	6616.04	8525.37	11532.5	5518.21	319.749	124.966	514.532	50200.4	67744.4	92477.9
	4	C10 H18 O8			266.1	1.883	45900.7	70728.9	6776.91	4823.14	79366.5	67808.3	40491.5	62594.9	22356.7	502.133	466.615	537.651	5322.62	5662.51	5492.56	872346	704036	1.04066e+06	736606	1.35165e+06	1.47834e+06	2.17491e+06	1.78983e+06	2.55999e+06	655.321	574.811	735.831	976047	1.05348e+06	1.86733e+06
	5	C30 H46 N3 O16 P S			767.234	1.229	7171.72	9066.56	5861.37	6096.34	7335.29	7499.05	1515.37	1321.6	1373.41	212.058	358.882	65.2349	6258.97	1073.82	4239.91	4622.79	4322.34	4923.24	9116.11	4655.55	2675.49	13318.3	16725.8	9910.74	184.463	73.3014	295.625	47500.8	23884.4	73071.8
	6	C8 H9 N O7			231.038	1.15	9938.32	7627.3	11383.5	10784.3	10658.9	9237.53	68992.8	95705.9	69706.2	1206.31	1885.95	526.679	3654.86	4106.7	7788.3	4633.71	2717.2	6550.22	1966.22	1012.68	1434.85	1958.47	2347.24	1569.71	107.655	128.543	86.7659	3087.1	2027.39	3527.62
	7	C29 H45 N2 O P3 S2			594.217	8.694	4657.67	3392.67	5580.23	5092.89	4704.39	4518.16	188.915	441.513	110.181	256.071	125.118	68.001	272.649	424.124	130.438	390.6	705.162	76.0371	180.572	163.211	145.85	79.0427	105.009	108.902	174.679	284.365	64.993	866.354	566.637	266.919
	8	C20 H33 N2 O5 P3			474.159	1.395	88098.7	78102.5	91073.7	97411.5	88703.5	85202.5	30057.3	35222.2	21833.7	499.977	665.68	334.274	25569.9	57783.2	57067.6	85575.5	69813.5	101338	61690.4	58255.8	50007.8	56022.6	46335.6	65709.7	9336.6	8746.09	9927.1	42653.8	51897.1	41934.4
	9	C15 H24 N4 O17 S			564.085	1.196	29735.8	29270.4	31271.2	28249.7	29717.9	30170	24455.9	27918.5	32174.9	1665.83	3264.12	67.5423	52990.4	68396.1	37584.7	50524.1	68412.5	32635.7	19686	59921.7	15792.5	51558.4	60300.5	42816.3	208.448	185.65	231.247	25002	64445.3	18346.3
	10	C12 H19 N O10			337.101	1.25	5386.94	5557.66	5801.03	4021.81	6211.59	5342.62	4404.47	1623.92	1862.65	350.882	613.408	88.3555	1199.55	831.903	1725.54	891.75	969.716	813.784	3956.22	1151	4945.51	5212.55	3775.48	6649.62	84.9233	91.0877	78.7589	13155.1	7089.56	19220.6
	11	C6 H13 Cl O6			216.04	1.102	688708	828431	717070	560044	725285	612712	963564	631448	981266	323883	390718	257047	217494	89255.2	345733	669292	245900	1.09268e+06	508144	317524	698764	244035	553597	863159	447033	338378	555687	621052	547708	694395
	12	C13 H21 N O7			303.133	5.552	4977.14	3613.95	6290.29	5163.98	4838.07	4979.42	334.519	232.044	164.549	235.63	88.9981	78.9864	207.158	114.673	184.952	213.065	295.466	130.664	196.032	779.473	316.51	496.463	195.769	797.157	99.2194	80.7802	117.659	49624.1	76114.9	23133.3
	13	C19 H27 N2 O7 P			426.154	9.197	7151.09	4718.62	8867.67	8086	7284.52	6798.66	98.5307	85.8437	73.1567	273.607	69.1739	65.9703	2171.5	3363.24	1016.33	25694.2	7228.91	44159.5	1424.92	1664.85	1904.78	2304.76	2624.47	1985.05	137.658	209.855	65.4615	3797.8	2662.99	1528.18
	14	C10 H7 N4 O8 P			341.999	1.301	59862.9	44925.9	76975.8	56545.8	60949	59918	11152	8503.69	13804	139.561	183.569	95.5538	35049.4	20183.3	49915.4	22938.3	32123.6	13752.9	37227.9	17972.6	41685.7	47107.9	65511.1	28704.8	7535.69	836.555	14234.8	34980.8	27731.2	25253.5
	15	C13 H20 O15			416.08	1.158	7479.64	7609.91	7947.68	7289.13	6422.36	8129.14	3557.41	4357.76	4051.37	144.814	233.873	55.755	10157.3	7186.94	8672.11	17169.5	7182.2	27156.9	31422.5	16909.8	24166.1	4550.43	6204.77	2896.08	70.808	69.3171	72.2988	2195.07	1413.72	2518.82
	16	C11 H11 N4 O10 P			390.02	1.424	34736.4	38921.6	34350.2	33183.8	26581.4	40644.8	1111.49	1030.18	719.354	640.86	553.61	174.083	5757.11	7452.89	4061.33	5259.85	9593.16	926.545	10318.3	9747.15	9176.01	2039.8	135054	59926.8	963.149	1579.84	346.46	41069.8	14335.9	27702.9
	17	C46 H66 N4 O12 P2			928.415	13.787	8927.95	7164.12	10489.4	9279.19	8866.23	8840.77	19265.4	3773.48	11519.5	269.994	463.092	76.8956	2836.27	1823.25	564.501	726.421	1378.1	74.7445	3705.52	1614.93	1806.8	2157.59	3611.19	703.997	81.6992	84.3523	79.0461	4856.21	5040.77	4948.49
	18	C25 H36 N4 O18			680.202	1.397	262787	257080	269832	263444	259135	264447	1602.69	1591.42	1243.93	390.28	501.433	279.128	16822.3	9774.06	23870.6	16450.5	21542	11359	80432.9	59807	39181.1	174227	182774	165679	2839.65	594.223	5085.08	320389	112747	176963
	19	C11 H16 N2 O6			272.101	1.366	33805.8	30736.1	35939.5	35748.6	32854.9	33749.8	79595.7	88704	97812.3	751.35	1122.67	380.033	5339.74	5348.84	5357.94	5680.39	7898.38	3462.39	1771.09	5839.77	3544.15	3567.08	2756.47	4377.68	817.962	788.198	847.726	5610.78	3580.32	1549.85
	20	C11 H12 O11			320.038	1.384	158066	109004	181251	181243	175025	143805	2612.68	7694.14	1761.99	717.212	896.142	538.281	118096	199505	280915	115341	51281.1	179401	302754	112567	207661	108889	126443	91336.4	983.985	951.675	1016.3	41435.2	46047.9	36822.6
	21	C36 H63 N2 O16 P			810.391	19.165	12911.1	10347.6	14520	14131.5	13172.5	12383.9	7093.18	12533.2	9813.21	663.949	996.241	331.657	6519.83	2572.97	4546.4	2642.14	3861.06	1423.23	9010.09	3737.49	6373.79	20269	7161.62	33376.4	2360.29	328.945	4391.63	73324.5	16231.1	44777.8
	22	C37 H59 N6 O10 P			778.401	18.618	3351.46	2687.09	3694.19	3800.96	3395.46	3179.62	15256.1	10627.9	19884.4	1184.87	947.138	1066	975.613	1318.24	1146.93	1279.19	2418.13	140.258	569.151	2816.44	1692.79	190.046	1967.24	1078.65	3500.33	508.89	6491.77	10467.6	13447	11957.3
	23	C7 H12 N2 O2 P2			218.037	1.102	178097	202073	191976	169328	161083	166026	245590	142014	226144	74584.3	92696.4	56472.1	52548	18821.7	86274.2	145869	57230.8	234507	120776	76097.1	165455	305327	339883	270770	96983.8	75546	118422	456389	127449	232839
	24	C15 H20 N4 O11			432.112	1.372	88374.8	176634	11317.8	17867.1	207896	28158.6	8175.42	11028.5	34539.6	155405	174187	136623	18197.9	17150.2	16102.5	13778.3	14455.1	13101.6	34713.8	34233.5	34473.6	23285.1	12018.1	34552	380758	372288	389228	24502.7	23584.2	27312.8
	25	C66 H91 N10 O11 P3 S			1324.58	15.932	7280.23	7387.82	9900.94	2061.82	8373.46	8677.13	560.356	518.51	1860.84	1864.76	800.552	312.084	3645.18	5982.12	172431	14487.4	11833.2	17141.5	1932.13	1497.98	1063.82	4125.29	6887.42	1363.17	192.426	311.627	73.2254	3510.72	4977.97	14319.2
	26	C12 H10 N4 O6			306.059	1.379	40627.2	32099.1	50703.2	41373.4	36480.1	42480.4	2117.38	1812.93	1377.12	383.79	444.761	322.819	14184.6	33590.3	52995.9	22596.9	8732.27	36461.5	82895.7	19962.7	66999.3	33686.3	40075	27297.7	679.659	675.353	683.966	29820.6	31668.1	27973.1
	27	C7 H16 O12 S			324.036	1.373	36303.2	29864.1	39317.8	40268.3	37451.8	34613.8	200219	142887	101039	54202.4	29961.5	42081.9	28277.5	24778.9	14201.3	18921.9	19759.5	18084.4	7958.08	11867.3	9583.76	3364.38	5112.51	1616.26	935.652	1203.04	668.262	1832.32	1521.91	1257.55
	28	C18 H35 N2 O10 P			470.2	10.15	9854.1	6544.24	12262.7	11118.7	9900.49	9444.34	570.672	498.726	477.569	278.688	222.368	375.49	267.678	272.264	269.971	362.253	419.784	304.722	166.062	374.742	270.402	77084	4858.99	149309	314.706	298.312	331.1	1194.02	440.212	1947.82
	29	C27 H33 N2 O13 P			624.171	9.351	11670.3	7656.24	14701.7	12604.7	12428.1	10960.7	4445.04	3527.76	2294.92	72.0568	75.3352	68.7784	1266.58	1743.49	789.676	6387.24	5890.82	6883.66	11264.9	24613.7	37962.5	19657.9	16380.4	22935.4	270.396	348.916	191.876	14814.2	12416.2	10018.1
	30	C21 H37 N2 O10 P			508.216	13.856	6227.1	4618.6	7034.98	6999.71	6774.59	5707.61	263.809	476.419	186.108	268.587	80.3531	137.415	1289.67	849.424	409.182	112.337	75.9883	148.685	2236.55	7365.18	12493.8	73389.9	5904.41	140875	286.027	257.553	314.5	709.871	211.081	1208.66
	31	C23 H26 O4 P2 S			460.101	5.384	20292.1	14787.1	24761.7	22397.3	19236.3	20277.8	61823	68378.1	55268	520.029	959.485	80.5744	6001.05	11458.9	16916.7	7035.13	2221.11	11849.1	16567.7	11132.6	13850.1	3303.95	3474.25	3133.65	74.3716	77.45	71.2932	3000.33	3059.87	2940.8
	32	C63 H81 N10 O10 P			1168.59	13.131	4088.57	3166.56	4858.36	4338.53	4128.97	3950.44	27662.8	50791	4534.61	110.971	808.713	91.2488	153.685	532.064	91.4639	199.885	117.86	281.909	90.2541	92.7863	95.3185	88.1045	99.8644	96.4849	93.7388	93.3522	94.1254	88.066	97.0652	98.8291
	33	C20 H34 O10			434.216	7.513	5976.72	3906.9	7309.89	6929.35	6077.79	5659.66	1084.57	1745.75	674.653	1162.78	1820.31	1491.54	3312.92	12349.3	16740.9	65412.2	14147.2	116677	2591.68	8944.46	5580.53	5184.76	2956.31	7413.22	284.862	328.073	241.651	2787.95	48228.5	3483.98
	34	C14 H23 N O9			349.138	1.379	14341.3	12755.5	14573.1	16846.2	13319.3	14212.3	1944.29	2032.57	1567.74	1635.98	499.439	368.034	2252.85	1550.69	1523.71	1652.65	1834.34	1470.96	1732.13	1937.98	1318.11	2269.98	2401.12	2138.84	1426.42	765.435	2087.4	2751.48	10072	17392.6
	35	C21 H32 N4 O9			484.216	12.838	10299.8	7703.82	12177.2	11083	10664.8	9870.29	636.803	827.62	459.446	669.772	629.882	589.993	385.534	279.772	174.009	307.345	106.954	507.736	458.645	299.863	379.254	101.173	4310.13	2205.65	622.473	629.567	615.38	318.918	546.5	91.336
	36	C13 H22 N10 O9			462.159	1.318	57911.2	58630.3	56564.1	59846.4	56141.4	58373.7	1398.46	1650.91	1146.02	145.702	199.857	91.5461	4746.3	6852.01	2640.58	4489.52	3341.29	5637.75	7050.57	6865.82	6958.19	26777.5	20759.6	32795.5	12494.6	443.797	24545.4	116895	191975	95987.3
	37	C13 H18 O11			350.085	1.86	21830.2	30551.5	21027.1	19093.8	28399.6	10079.1	787.976	639.856	628.16	300.353	465.067	135.639	2627.26	3034.47	3441.68	2168.44	944.731	3392.15	2873.29	1008.76	1941.02	310.105	856.51	583.308	306.001	247.787	364.214	168944	138650	108357
HILIC_pos	1	C10 H16 N2 O11 P2 S4			529.912	10.019	69903.9	65502.5	66490.8	127955	65996.6	97222.8	1565.88	1757.63	1661.76	8516.57	7249.05	7882.81	35257.4	86467.7	60862.6	151582	91540.5	211623	138419	117545	127982	54598.6	34429.7	14260.8	1145	2213.88	3282.77	1072.68	3967.44	4921.1
	2	C10 H17 N O8			279.095	9.313	18712.9	16223.4	15564	9870.55	15893.7	12717.3	2265.66	2268.85	2267.26	14524.4	14186.7	14862	19864.8	21245.6	18483.9	41171.1	44908.3	37433.8	1930.62	2178.27	2425.93	24861	36575.6	13146.3	38522	42067.9	34976	111300	183757	418250
	3	C10 H21 O12 P			364.077	7.689	27889.6	25548.2	22896.3	28235.7	24222.2	25566	1453.93	1591.51	1522.72	153969	122437	185500	127584	123443	131726	109928	109930	109925	21088	113996	67542	20596.8	64400.2	68958.2	18562.8	179656	34957.9	25408.3	30066	27737.2
	4	C10 H8 Cl N4 P3			311.964	10.742	24556.9	24971.9	26344.6	35979.1	25658.3	31161.9	48475.9	65819.3	98236.3	21624.5	32256.9	19245.4	21683.7	56160.5	20971.8	60259.9	105625	14894.5	23675.5	35406.4	29540.9	23328.8	80440.1	51884.4	1747.86	2200.67	2653.47	7236.25	3142.2	8728.85
	5	C10 H9 N O8			271.033	11.782	1883.82	2077.74	1642.73	2027.24	1860.23	1834.99	21112.8	14787	83429.2	21970.9	4289.75	39652	2770.24	1584.06	3956.42	1881.36	1942.6	1820.11	1181.21	1267.71	1094.72	1291.8	1379.97	1203.64	1271.08	1266.84	1275.31	1409.09	1389.36	1428.81
	6	C11 H12 Cl4 N10 O5 S3			599.891	8.514	145543	111373	122336	119891	116854	121113	108440	152534	130487	54349.4	38120.1	70578.7	57685.1	59296.8	56073.4	4323.12	3918.89	4727.36	136121	45322	90721.3	20198.3	25066.7	15330	24374.1	32938.9	15809.4	157287	96051.9	34816.9
	7	C11 H13 N5 O			231.111	0.369	7191.3	238.152	5533.51	3190.54	2885.83	4362.03	150.075	144.342	461.074	594.375	451.259	737.491	154.792	688.589	415.831	318.879	260.874	376.884	410.005	419.039	235.943	642.209	570.577	713.841	150.171	468.08	373.398	139.155	486.012	439.297
	8	C11 H15 N5 O4 S			313.085	5.565	7369.89	10063.7	6421.64	9087.05	8242.68	7754.35	133946	88972.8	111459	25434.2	462882	678618	86718.9	54210.6	119227	114684	48044	181323	11645.9	68830.2	40238.1	4017.78	5279.58	6541.37	4426.84	9707.31	5913.38	8160.52	10008.6	14320.4
	9	C11 H16 N4 O13 S3			507.987	10.114	10582.7	11448.1	11640.5	15380.7	11544.3	13510.6	506.111	1504.28	1005.2	6462.34	4454.55	5458.45	51655.3	26832.7	76477.8	26920	24449.5	29390.4	16741.2	22603	19672.1	9860.45	6016.54	2172.62	2620.33	14002.5	2203.21	5000.09	4354.6	3256.79
	10	C11 H18 N2 O9 S			354.072	1.596	9013.19	9116.85	9093.67	6060.3	9105.26	7576.99	1990.06	2572.87	1112.96	1523.81	1359.46	778.121	1271.59	903.442	621.653	910.126	1119.72	700.533	1602.73	879.591	824.093	1415.73	1110.1	1698.29	5219.68	632.745	9806.63	12663.3	41796.1	18678.5
	11	C11 H20 N2 O7			292.127	9.068	4883.08	4112.13	4494	5341.09	4303.07	4917.55	13002.3	46506.8	29754.5	6873	29998	53123.1	83430.7	144022	22839.7	94584.2	174449	14719.6	813.711	1002.89	1192.08	1596.59	8863.25	8779.17	27952	52581.7	3322.36	15447.6	18797.5	12097.7
	12	C11 H21 P S			216.111	6.469	20945.4	15752.1	18476.9	19409.9	17114.5	18943.4	4532.86	1571.86	2686.09	1392.78	1920.79	1947.16	3037.64	3196.57	2878.71	1568.95	1761.32	1376.57	1141.78	1601.26	1029.13	2777.58	6833.03	4229.59	34883.4	25419.6	30151.5	80796.4	32401.6	56599
	13	C11 H9 N10 O3 P			360.061	8.469	17499.2	18780.9	21338.9	29951.2	20059.9	25645.1	8570.09	10283.4	9426.77	17541.1	20926.2	14156	21774	25791.8	17756.2	22237.1	26272.6	18201.6	5901.05	3499.86	1098.68	9597.7	10763.2	11928.7	2654.25	4789.87	6925.5	5151.65	14429.3	15311.2
	14	C12 H10 N6 O8			366.057	9.187	825.913	585.965	922.192	640.551	754.078	781.372	13204.6	6698.41	19710.9	8600.51	8262.53	8938.48	14580.1	21887.3	7272.89	34575.8	57852.1	11299.4	503.655	1068.07	1632.49	38547.5	19841.6	57253.4	396416	470947	321884	357858	118989	596727
	15	C12 H13 N5 O5			307.09	8.083	15109.4	12227.2	16552.5	22859.3	14389.9	19705.9	10841.4	10806.4	10823.9	163819	152376	175262	12217.8	91060.7	51639.2	139769	218319	61218.5	14359.1	7824.42	1289.75	154675	185045	124305	148953	188048	109857	44697.2	557725	361041
	16	C12 H15 N O9			317.075	7.474	4998.86	3611.23	3271.48	3676.46	3441.35	3473.97	38989.1	48746.1	29232.1	6607.31	5413.66	16782.8	898.061	2092.02	1285.81	1989.2	2095.44	1882.96	1001.48	2372.5	1188.43	1223.07	1214.28	1956.04	1043.8	3578.04	1471.73	3456.35	3017.59	1805.74
	17	C12 H16 N2 O P2 S			298.046	1.957	15724.3	15226.2	15803.1	11405.3	15514.6	13604.2	1006.02	929.575	2312.67	3708.44	3047.46	5770.97	3509.34	11082.3	3825.2	14216.6	4946.26	23486.9	4158.72	5099.78	3217.66	3692.48	8752.62	13812.8	16197.9	4656.18	10427	21125.5	56107.5	91089.4
	18	C12 H16 O9			304.08	5.659	37881.6	37185.1	33368	32021	35276.5	32694.5	5483.39	8549.23	7016.31	8877.21	137635	185868	477050	488731	465370	612568	745047	480089	32690.3	17780.5	2870.73	28266.7	98760	169253	39030.2	64149.8	89269.3	430743	631480	230006
	19	C12 H29 N4 O4 P			324.194	1.827	373393	337335	441530	301507	389432	371518	289173	697560	366842	172301	139931	132361	75244.1	54609.1	32775.9	138630	32545.1	244714	374013	97196.2	19882.5	59759.9	57551.4	55342.9	288791	497944	707097	352149	747245	504389
	20	C12 H9 O4 P3			309.972	2.019	116.754	484.872	1013.91	799.804	749.391	906.857	10592.7	6811.73	3030.8	1278.11	2386.94	2260.58	2646	2662.29	2629.71	4211.49	2523.32	5899.66	479.714	2046.78	215.589	5655.41	4809.15	6501.67	5131.15	4662.38	2800.17	6323.54	9909.12	2737.95
	21	C13 H14 N4 O7			338.085	8.329	98117.1	105051	119826	193671	112438	156749	4707.23	5123.8	12594.2	11640.8	8811.38	14470.1	23422.9	22004.9	24840.9	33615.1	47389.6	19840.5	190577	23384.7	106981	58327	57176.9	59477.1	31218.7	28980.8	33456.6	61501.2	27790	95212.4
	22	C13 H20 N4 O6			328.137	8.085	447660	467654	437573	511010	452613	474291	119797	210484	163975	344394	626754	895534	1.13124e+06	993408	1.26906e+06	1.05731e+06	1.03577e+06	1.07884e+06	601297	674422	637860	368176	938857	597025	162529	703937	286660	359678	473506	416592
	23	C13 H21 N O S2			271.106	2.065	18122.6	16977.5	16490.8	11190	16734.2	13840.4	173952	145203	159343	12481.5	14887.2	17293	6419.26	1090.27	4001.03	1545.47	1723.7	1367.24	1079.54	987.46	1171.62	5972.18	2258.36	2160.52	6931.97	6135.96	5339.95	7807.85	6498.7	5189.56
	24	C13 H34 N6 O S			322.251	1.314	70839.1	46051.2	59137.5	64753.1	52594.4	61945.3	100860	114022	107441	10292.2	11562.8	9021.54	20635.5	9392.57	10622.1	15931.9	10364	21499.8	8162.71	11682.6	4642.83	23362	20135.2	21748.6	33214	16340.8	39607.7	33518.3	33373.5	33228.7
	25	C13 H34 N9 O P			363.262	6.546	15459	13406.9	16568.2	20154	14987.6	18361.1	40980.1	90889.7	65934.9	10351.6	40061.1	69770.6	63043.4	90160.8	35926	83336.9	107652	59021.5	1986.03	3139.71	4293.39	37526.2	51640.1	23412.3	53947.7	84668.1	23227.2	86595.2	136301	36889.1
	26	C14 H14 N6 O6			362.098	7.599	71064.5	48653.5	45882.7	53357.2	47268.1	49620	51782.5	65578.6	81718.1	67284.1	62253.9	59796.7	42477.8	62270	54948.8	87696.1	109879	65513	48302.9	43156.9	45729.9	49364.1	73796.3	35784.8	41595.6	35295	17040.4	65135.5	13586	31520.2
	27	C14 H15 N4 O6 P			366.072	5.231	5602.09	5229.8	5680.33	6273.08	5455.07	5976.7	88694.9	38245.3	19842.3	28053.6	16551.2	11791.1	11744.2	9759.25	13729.1	15081.3	17157.8	13004.8	4728.88	11364.1	8046.48	60803	78090.8	43515.3	18360.5	14626.1	22094.8	20611.1	25026.7	16195.6
	28	C14 H16 N5 P3			347.063	8.897	14750.5	14475.6	12893.5	16713.8	13684.5	14803.6	61156.1	58212.2	59684.2	16233.7	71091.9	50081.6	32274.3	33014	31534.5	37050.9	34222.6	39879.3	6427.67	16967.7	11697.7	3637.24	11739.2	7688.24	6435.38	5231.28	4027.17	16501	15507.4	17494.7
	29	C14 H19 Cl O9			366.072	8.086	127692	118347	113530	117061	115939	115296	55405.7	100031	77718.4	49423.5	22907.9	19329.9	8031.28	5312.5	10750.1	5902.99	1857.41	9948.57	2369.35	4419.66	319.048	5360.4	9713.88	1006.91	2623.34	1809.74	3436.94	5983.25	10180.4	1786.08
	30	C14 H22 O2 P2			284.111	8.31	39788.2	38068.2	37562.5	44602	37815.3	41082.3	5934.74	10719.3	8327.02	203006	255730	150282	377520	508774	246266	533475	634753	432197	30269.7	17158.7	4047.67	279258	349786	208731	14222.6	54274	94325.3	331306	254295	408316
	31	C14 H23 N O9			349.137	8.575	7526.95	10307.1	8184.6	13097.6	9245.86	10641.1	1091.02	997.375	4949.83	2262.37	3605.21	3655.59	2318.35	3987.38	3664.84	3832.41	4806.58	2858.24	2685.6	2726.41	1953.77	2520.7	4579.53	3550.12	273375	285816	260935	529240	506774	551706
	32	C14 H27 N2 O14 P3 S2			604.011	10.136	13090.9	12654.3	13107.9	15486.6	12881.1	14297.3	46422.9	51916.3	49169.6	132408	99020.5	165795	15704.6	59281	37492.8	31797.7	58665.6	4929.87	12111	37694.4	24902.7	14258.4	11156.8	8055.16	1347.04	1830.62	2314.21	3045.78	2703.37	3388.2
	33	C15 H13 N O6			303.074	8.905	240705	218077	312585	153037	265331	232811	61306.6	223071	142189	334146	106875	47151	57373.4	53718.3	61028.6	29136	49368	8904.05	173055	22277.2	97665.9	101778	100425	99071.1	36826.3	41024.2	32628.4	10243.3	12730.9	8532.28
	34	C15 H2 Cl N10 O5 P3			529.912	10.124	69903.9	65502.5	66490.8	127955	65996.6	97222.8	1031.14	833.685	932.413	8516.57	2218.26	10608.4	35783	50334.6	43058.8	12183	3803.34	20562.7	138419	113685	126052	54598.6	36086.5	17574.4	33021.9	95760.5	64391.2	5453.32	9352.88	1553.77
	35	C15 H22 N2 O S2			310.118	1.759	896.148	953.028	1072.66	1052.73	1012.84	1062.7	94.4107	395.927	245.169	5685.49	5850.55	5520.43	868.491	1346.7	855.359	1258.74	1436.8	1080.67	1496.73	3767.23	7994.82	4289.84	3083.74	5495.95	1546.93	6049.13	3798.03	15449.6	36397.6	83978.7
	36	C15 H29 O12 P			432.14	4.345	391247	474568	318545	328100	396556	323323	31492.7	45007.1	38249.9	278937	234790	323083	33568.7	78765.7	56167.2	144519	98228	190810	74357.6	54663.5	64510.6	295132	403937	186326	542111	366856	191601	289786	780908	250873
	37	C16 H16 N4 O P2 S2			406.023	10.827	5619.73	6826.03	6629.01	12246.2	6727.52	9437.59	32046	58930.1	35157.5	5984.92	4310.83	4067.59	7219.04	5334.59	3450.14	28733.7	53550.6	3916.83	6535.86	11965.2	9250.55	7704.46	4459.35	1214.24	976.13	1341.91	1707.69	1483.22	1627.06	7089.05
	38	C16 H22 N2 O2 S2			338.113	1.543	6668.48	7959.69	6909.94	6148.01	7434.82	6528.97	2333.29	2916.08	2624.69	21142.7	16049.2	26236.3	3334.58	3694.37	1035.01	10094.4	1129.69	19059.1	10384.4	3408.09	8774.74	4637.41	3302.79	1968.18	3017.87	2282.06	1428.93	2922.93	1029.85	4816.01
	39	C16 H25 N O9			375.153	7.588	4637.03	3185.9	730.662	2990.04	1958.28	1860.35	14991.6	5146.69	10069.1	2611.33	69983.9	98195.1	47730.8	44078.1	51383.4	40656	62779.7	18532.3	3108.27	2100.79	1093.31	1660.69	5588.45	9516.21	11552.5	12298.7	10806.3	16184.1	19388.6	12979.6
	40	C16 H29 N O15			475.154	9.163	87692.8	88037.3	92314.6	151932	90176	122123	8915.46	9370.44	8367.49	21682.5	35182.2	28909.9	24819.2	29250.9	27104.3	27524.3	37133	17915.6	20425.2	20213.5	20319.3	49826.3	71457.2	15531.2	50696.2	75658.5	26713.3	107531	136919	166306
	41	C16 H29 N O9			379.184	5.57	29333.7	28565.1	25666.9	31568.9	27116	28617.9	6674.13	5302.01	5988.07	183501	265554	101448	376773	203799	549747	326777	372153	281400	51525.1	287281	169403	551363	842743	259982	101584	94775.7	87967.8	34626.1	45129.7	39877.9
	42	C16 H31 N O13			445.18	8.775	35202.5	41700.5	37620	31219.4	39660.2	34419.7	4805.14	5112.2	4958.67	16963.4	25782.7	83516.5	60085.1	72013.6	48156.5	101510	102999	100022	11078.1	10576	10074	13967	22092.5	30218	60756.7	76466.3	45047	21087.9	38941.7	56795.5
	43	C16 H32 N10 O4 P2 S			522.18	8.645	26691.8	26898.6	22581.8	35624.8	24740.2	29103.3	6845	18979	11198.7	18517.5	20605.7	22694	24804.9	23664.2	22523.4	8456.2	6377.65	10534.8	27924.5	19713.4	23819	18961.2	55084.6	40676	22238	46219.5	36675.2	23738.8	32559	32038.5
	44	C17 H10 N10 O3			402.095	6.559	13986.3	13371.2	10712.7	13730.1	12042	12221.4	17532.6	23958	20745.3	169106	100477	237734	6925.93	7560.28	7243.1	21911.8	9477.53	34346.1	59191.1	24630.8	41910.9	2986.36	7741.14	5205.62	10177.3	4688.7	7653.96	11801.9	6016.71	15937.6
	45	C17 H15 N4 P S			338.077	5.114	37087.6	34671.8	28424.4	34266.5	31548.1	31345.4	38801.4	39660.8	55686	2629.8	2902.45	2357.16	741.365	819.102	663.629	679.248	755.277	603.219	962.006	1113.57	810.441	1328.75	1626.12	1031.38	1154.52	722.097	1586.94	8488.34	1208.07	1894.9
	46	C17 H31 N3 O5			357.226	2.147	8638.09	8777.77	8813.6	9859.64	8795.69	9336.62	1341.88	1906.46	15908.4	37693	14220.7	61165.3	18464.7	12897.7	24031.6	16792.6	11948	21637.2	4067.01	2717.78	1368.54	7613.46	5121.56	2629.66	11005.2	22588.9	4712.42	1626.14	6420.27	3231.91
	47	C17 H39 Cl N4 O			350.282	1.279	241675	232692	216399	196536	224545	206467	128573	95567.5	112070	6325.06	8411.34	4238.79	4900.26	6623.44	3177.07	6258.84	6909.14	5608.54	3470.52	4461.83	2479.21	5545.68	6368.79	4722.57	12740.7	2816.34	22665	54304.6	95132.9	13476.2
	48	C18 H15 N5 O4			365.111	4.529	145664	148075	140877	161319	144476	151098	4300.73	9856.76	6337.9	9779.65	3170.55	4434.28	2580.72	2430.48	2730.97	2525.32	2699	2351.64	6173.43	2721.02	2740.56	39973.6	30008.4	20043.2	11344.8	2646.35	5968.71	59154	32268.1	5382.26
	49	C18 H29 N7			343.247	2.045	39197.7	34386.8	38447.7	39749	36417.2	39098.4	15946.6	25112.3	20529.5	28510.3	195163	203013	37606.5	61240.5	84874.5	283997	369040	198954	30672.7	17815.1	4957.53	25394.4	201401	113398	2404.19	11542.7	6973.45	253145	224828	281462
	50	C18 H31 N2 O3 P3			416.153	9.273	47778.6	50676.3	45507.8	53371.6	48092	49439.7	130434	98668.6	114551	163035	266481	645076	58100.4	130142	159376	181786	118969	244603	53711.6	76532.2	65121.9	40354.9	88699.2	10468.1	9153.53	8982.74	6056.38	28828	9482.5	11313.6
	51	C18 H43 N9 O2 P2			479.301	2.2	163779	160629	142149	177784	151389	159967	34189.2	41880.7	38034.9	53515.2	37238.1	35811.4	49591.9	57139.8	48063.3	59275.7	46080.4	72471	36325.8	52384.8	44355.3	53728.3	95183.2	92091.2	252331	102234	175367	96084.7	135718	51099.7
	52	C19 H28 N4 O2			344.22	2.274	448633	412850	429108	409778	420979	419443	69732.4	87516	78624.2	2763.12	3383.63	2142.6	1115.33	1353.75	876.903	1570.32	1132.95	2007.7	1372.69	929.215	1816.16	2109.02	2791.24	1426.8	151886	9675.99	118379	94634.5	99989.4	89279.6
	53	C19 H30 O5 P2			400.158	7.088	84571.3	69181.8	58268.3	64196.9	63725	61232.6	24354.6	50800.1	37577.4	97262.2	83879.1	110645	48316.6	98832.6	113174	168642	188491	148794	57606	72579.5	65092.7	48008.4	37235.6	26462.8	43736	99575.4	17054.1	52799	55171.6	55542.4
	54	C19 H32 N4 O11 S3			588.124	8.012	734.758	697.724	678.573	921.27	688.149	799.922	17456.2	72776.4	45116.3	1993.29	4302.78	6612.27	6726.15	7484.42	5967.88	6505.29	7149.04	5861.54	591.09	766.714	942.338	533.691	5790.68	2785.43	4417.37	5642.76	3191.97	4268.85	4411.97	4125.73
	55	C19 H36 O7			376.246	1.547	5520.92	5079.02	4891.58	4913.1	4985.3	4902.34	379466	66947	77406.9	52926.2	12988.1	39805.2	2992.17	3003.24	1821.23	2789.03	3178.05	2400	3255.77	2494.42	2504.62	2366.1	3217.83	4816.17	3832.37	2425.32	4019.86	4529.76	2897.18	6414.1
	56	C19 H37 N O12			471.232	6.688	8218.69	7371.7	7808.8	11294.7	7590.25	9551.73	13575.6	628.426	1121.48	1668.89	695.78	1306.54	316.129	695.203	926.899	5437.19	9548.07	1326.3	1105.31	790.689	704.773	7102.97	3989.28	875.58	5371.52	9492.79	1250.26	2695.47	2958.48	2432.47
	57	C20 H25 N5 O5 S			447.159	8.827	45030.7	45125.5	30242.2	60078.1	37683.8	45160.1	17333.3	21955.1	28597.7	28045.5	13077.8	43013.3	38997.9	26537.4	33199.7	37766.7	45244.6	30288.8	39816.4	26376.7	33096.6	31858.5	33189.8	34521.1	19279.9	52309.5	22447.3	62168.2	69845.8	54490.5
	58	C20 H30 N4 O11			502.19	7.898	31719.6	29939.1	31570.5	36227.3	30754.8	33898.9	4608.52	7015.36	5811.94	32279.5	26421.7	38137.3	62936.5	56274.7	69598.3	279204	393988	164419	25053.4	60340.3	42696.9	147823	80848.2	13873	187718	671770	429744	44768.9	62321.4	27216.5
	59	C21 H33 N3 O3			375.252	1.286	38208.6	36609.3	35921.8	48701.7	36265.5	42311.7	69327.2	46348.7	57837.9	970456	848965	1.09195e+06	1.36333e+06	1.25498e+06	1.47168e+06	1.89039e+06	2.31054e+06	1.47024e+06	78265	58576.4	38887.8	50218	288383	526548	833303	1.10727e+06	559334	1.52358e+06	1.97345e+06	1.0737e+06
	60	C21 H33 N5 O10			515.221	6.652	115468	104012	92984.3	155452	98497.9	124218	5887.74	9262.42	2513.06	1106.3	1083.17	1129.43	3431.17	1100.66	1684.3	1516.26	2290.39	742.13	860.497	908.116	812.878	4908.01	3317.23	1726.45	26626.1	19695.2	22909.7	68430.1	78003.4	58856.8
	61	C21 H35 Cl N4 O3 S2			490.182	3.145	23669.3	10417.4	3661.72	6143.49	7039.58	4902.61	3504.98	3400.92	3452.95	47359.8	29662.3	65057.4	2919.67	19881.7	3193.56	57718.6	54287.3	61149.9	3588.39	2900.34	2212.29	79544.8	101596	57493.6	33484.2	12868.3	54100.1	19682.2	20832.4	18532
	62	C21 H35 N4 O6 P3 S			564.148	9.027	55546.4	52862.6	53670.2	59360.6	53266.4	56515.4	336373	209343	463404	302150	260774	343527	187459	165805	209114	121674	205587	37760.9	8139.26	4574.12	1008.98	3458.47	5993.89	2702.97	2222.11	4568.71	6915.31	2216.36	4496.38	6776.39
	63	C21 H37 N2 O P3			426.21	5.648	33079.3	34263	24212.9	27911.8	29238	26062.4	19951.5	65395.6	33189.3	62517.5	75016.1	50019	22216.5	104013	87441.6	120036	154695	85377	41203.6	75711.9	58457.7	232282	300581	163982	27313.6	77296	78386	23979.4	53899.5	83819.6
	64	C22 H31 N5 O6			461.226	5.478	2326.08	2279.63	2316.65	2501.9	2298.14	2409.28	19951.5	26901.5	52411.1	96934.2	166794	27074.7	41930	64940.9	18919.1	35199.7	57357.9	13041.6	1650.04	1655.69	1661.34	20362	30714.5	10009.6	1869.93	4181.68	6493.44	3120.13	4002.15	8462.32
	65	C22 H34 N4			354.277	1.285	383710	393278	373408	397996	383343	385702	608682	538115	573398	2479.55	3340	1619.1	3273.29	2529.97	4016.61	6116.55	2938.86	9294.25	1362.37	1704.29	1020.46	4455.06	7142.22	1767.9	1810.6	2112.36	1508.84	12334.4	22478.2	2190.49
	66	C22 H35 Cl N4 O			406.249	1.333	256339	255858	232409	211943	244133	222176	294167	176697	235432	3144.72	4151.66	2137.78	3153.96	3417.84	2890.07	2638.06	3565.26	1710.86	1948.23	2235.8	1660.65	2751.68	3134.15	2369.2	4056.41	2475.23	5637.6	27733.3	45632.6	9834.07
	67	C23 H24 N8 P2			474.159	8.835	140394	110151	127518	148580	118834	138049	31864.2	46831.7	39348	175972	169340	182604	323328	336191	310465	423344	402591	444097	117482	247433	182458	150768	193697	107839	31990.6	55099.3	78207.9	256885	145993	367777
	68	C23 H28 N6 O			404.233	1.296	17338.2	22053.5	21882.5	14941.1	21968	18411.8	101067	46913.4	73990.1	1852.51	2463.55	1241.47	1420.5	1939.9	901.088	1521.73	2023.58	1019.87	1044.62	1306.8	782.432	1785.77	2226.82	1344.71	22755.6	20298.3	17841	9017.56	14427.4	19837.3
	69	C23 H30 N10			446.267	1.27	7452.04	5855.8	4916.13	6582.69	5385.97	5749.41	1021.52	1269.17	1145.34	7465.77	9677.07	5254.47	12309.8	12881.7	11738	11573.5	7948.83	15198.1	9828.2	5133.24	2815.57	39507.6	28406.2	17304.8	22556.6	17948.8	27164.5	10886.8	27686.3	44485.8
	70	C23 H34 O P2			388.21	2.443	173870	141588	122878	89144.8	132233	106011	180806	343431	150227	93935.7	147457	40414.9	43597.9	70086.7	17109.2	109647	77747.3	141546	206527	70515.7	138521	152552	189240	148919	74535	25139.8	85034.7	138148	259139	158642
	71	C23 H36 N8 O16			680.224	9.227	19695.4	18805.4	17084.1	26981.7	17944.8	22032.9	2756.19	3519.78	2669.4	2610.94	3288.66	1933.21	4419.88	7417.89	1421.86	1840.6	1217.66	2463.53	418.332	894.306	387.764	337.454	494.348	651.243	320.153	759.923	741.413	497.206	961.747	1302.68
	72	C23 H50 N6 O2 S			474.371	1.25	17767.9	17344.1	18444.3	28370	17894.2	23407.2	23242.6	29005.1	78938.1	78853.3	55533.4	102173	112852	77588	148116	145126	81229.4	209023	24522.2	19962.4	15402.6	6986.47	13034.4	19082.2	17881.9	40467.4	47192.4	103400	162795	44005.9
	73	C23 H51 N4 O P			430.381	1.225	59879.1	57357.5	55794.4	68721	56576	62257.7	43491.1	51368.6	22219.7	29300.8	12849.6	45752	14146.1	48894.8	31520.4	85751.2	84321.5	87180.9	83677.7	61385.4	14757.9	11699.8	50175.7	88651.6	32319.9	60821.8	46570.9	336175	466944	205406
	74	C24 H36 Cl N2 O3 P S			498.187	1.805	35373.8	31036	35724.8	24499.3	33380.4	30112	4635.54	10958.4	7796.96	37425.2	41608.7	33241.8	91311.2	22152.8	56732	9701.32	8064.4	11338.2	82452.7	9345.44	45899.1	1281.86	854.265	1709.45	2794.54	1762.68	3826.41	3660.77	1058.69	6262.86
	75	C24 H45 N O15 S2			651.222	9.078	5687.68	5229.53	4429.66	7997.68	4829.59	6213.67	1154.29	670.174	912.231	4400.91	2334.49	6467.33	1483.54	1890.6	3087.41	2165.62	2002.9	2328.33	892.11	734.455	576.8	1736.01	3292.27	4848.54	1526.88	2634.02	3741.16	29193.3	26358.5	27775.9
	76	C24 H47 N4 O3 P			470.34	1.377	6664.18	6739.4	6594.18	7018.22	6666.79	6806.2	11426	16564	8326.27	5653.09	6075.94	5230.24	4536.72	4379.27	4694.16	18625.8	4664.35	32587.2		9496.13	3185.16	5284.03	6896.49	3671.57	9001.41	3678.91	6589.34	11381.8	41462.1	19247.5
	77	C24 H51 Cl N4 O2			462.371	1.249	32535.9	31925.6	10240.2	42898	21082.9	26569.1	28829.5	43524.3	59203.4	41932.1	36037.4	47826.7	60183.4	54565.6	65801.1	67523.4	66201	68845.9	37766.6	64497.6	51132.1	11060.3	60257.2	31111.5	35343.4	45184.5	154452	239443	298342	180543
	78	C24 H51 N4 O2 P			458.376	1.256	46160.8	52502.9	56050.8	72712.5	54276.9	64381.6	55974.6	57003.5	56489.1	132686	98123.7	167247	213799	116849	310749	230631	145370	315893	58869.1	46421.6	33974.1	28623.8	45978.2	63332.6	36524.5	110874	131469	260201	362760	157642
	79	C24 H53 N4 O2 P			460.392	1.265	157133	170039	166443	178767	168241	172605	114421	112416	113419	200297	110777	289817	580833	319071	842596	522583	509463	535703	92567.3	100553	108540	151255	255907	360559	555510	432424	493852	506684	688641	870598
	80	C24 H56 N9 O4 P			565.421	1.266	1.81403e+06	1.70032e+06	1.576e+06	1.54382e+06	1.63816e+06	1.55991e+06	14286.4	5891.25	12837.5	7463.76	9541.53	5385.99	5688.14	7513.4	4484.35	6303.46	7837.49	4769.42	6340.64	5926.46	3462.65	11180	8412.03	11752.5	35714.7	3845.91	19780.3	1.4049e+06	4.47196e+06	7.53902e+06
	81	C25 H26 N10 O4 S2			594.159	8.763	22524.6	20207.9	17671	21477.1	18939.4	19574	4513.31	65136.2	34824.8	147794	99602.5	195985	4384.58	82239.8	160095	47756.9	71129.1	24384.8	4724.29	3993.78	3263.27	5246.07	6223.89	5662.07	5592.27	4733.08	4103.55	5387.99	4753.47	4118.94
	82	C25 H38 O3 P2			448.231	2.206	62308.3	51939.5	54635.4	44636.5	53287.4	49636	200803	336710	268756	24536.4	44382	4690.89	4584.62	6836.03	2333.21	5387.52	1962.06	8812.99	40197.9	6240.29	722.512	125221	11645.9	68433.5	3468.92	1869.41	5068.44	5931.54	3611.48	8251.6
	83	C26 H24 N P			381.164	7.674	12930.3	13464.7	13241.5	14105.8	13353.1	13673.6	4773.87	4720.46	10806.5	17199.4	21713.8	12685.1	29540.5	33166.9	25914.2	48336.1	47342.8	49329.3	13399.1	22313.1	17856.1	11563.1	17346.2	9448.47	4534.26	12910.3	5349.96	7657.39	6894.08	9095.2
	84	C26 H43 P3			448.259	1.315	19256.5	18293.4	17772.2	12228.9	18032.8	15000.6	137735	182394	160064	2140.64	2826.08	1455.21	6205.17	2326.55	1628.5	4956.06	3068.04	6844.07	4053.97	1521.93	1130.42	5619.01	7612.3	1612.73	9246.68	1512.24	2258.06	6054.65	6118.84	6183.04
	85	C26 H44 N2 P2 S			478.27	1.29	9958.86	12768.5	6634.87	6835.49	9701.71	6735.18	14027.4	9155.42	10477.6	16200.4	15280.8	17120	19541.8	17363.9	21719.6	26327.8	22964.6	29690.9	5342.09	3391.52	1440.94	30971.5	50864.7	11078.3	19688.1	22800.6	16575.6	51144.9	49521.3	29974.5
	86	C27 H34 N4 O3			462.262	1.502	133778	135818	125173	100484	130496	112828	3918.66	7421.16	12560.9	58542.2	49257.8	67826.5	313767	275996	206935	132949	101044	164855	118305	97258	107781	33453.7	50545.1	16362.4	76392.3	37241.1	54728.5	10932.3	56934.7	58441.9
	87	C27 H41 N2 O2 P3			518.236	5.018	17509.6	19362.7	15506	14522.4	17434.4	15014.2	42673	35980.1	49365.9	125080	141714	108446	149302	247958	50646	143285	241107	45463.6	46835.5	125900	86367.8	265893	348345	183441	167702	170367	165036	135514	132299	138729
	88	C27 H49 N10 O3 P			592.374	1.271	3883.78	6107.96	3629.37	4238.51	4868.66	3933.94	34457	24381.8	29419.4	2628.85	2850.44	2407.27	3251.46	2244.55	1419.19	3741.84	2628.97	4854.72	4036.91	1512.03	2774.47	2081.44	1824.95	1568.46	3727.94	1498.02	1989.65	4403.08	3173.23	1943.38
	89	C27 H61 N4 P S2			536.408	1.269	33928.5	34520.5	36042.4	56233.6	35281.5	46138	60813.9	49136.3	36254.7	48092.8	32920.3	63265.3	28004.4	60261	45546.5	37482.2	16564.9	58399.4	36039	47343.3	41691.1	19449.8	20646.6	21843.4	17346.9	18877.6	24158.9	9241.34	23233.3	37225.2
	90	C28 H44 N4			436.355	1.221	8422.02	8625.77	7692.34	8328.93	8159.06	8010.63	1442.18	1204.77	1489.65	1279.41	1635.4	923.417	1031.27	1337.51	712.605	1073.67	1401.87	745.458	4217.32	916.39	2566.86	1636.5	1151.34	1107.21	4816.4	6724.47	8632.54	8929.74	10495.8	7363.64
	91	C28 H58 O3			442.439	1.268	53188.6	55542.4	53520.7	54961.8	54531.5	54241.2	3679.92	4938.37	2421.47	13419.5	7500.79	19338.3	6967.21	3701.17	10233.2	10451.8	3404.14	17499.5	25287.7	4783.4	15035.6	25877.1	20254.3	23065.7	1292.42	912.795	1672.04	4456.29	7377.25	1535.33
	92	C28 H70 N10 O11 P2			784.467	1.215	2357.54	1551.98	1439.84	1997.63	1495.91	1718.73	9705.26	5660.88	7683.07	82521.4	85409	79633.8	4677.12	79230.9	56512.2	56569.7	70598.1	42541.3	2213.33	45801.6	24007.5	29979.3	43576.2	16382.4	1161.87	29018.4	15090.2	478.555	6509.81	3494.19
	93	C29 H34 O4			446.244	1.29	2058.17	2017.13	2016.9	2198.36	2017.02	2107.63	18132.2	22196	20164.1	2470.75	3285.71	1655.79	1236.02	2587.31	1241.06	4544.06	2698.91	6389.21	1803.82	1742.92	1091.98	1164.49	2372.56	1807.97	3773.69	1269.2	2481.49	4946.24	4098.65	3251.06
	94	C29 H38 N10 O3 P2			636.259	1.157	326691	476886	434167	624550	455526	529359	222653	137179	179916	29332.9	33311.8	25353.9	95318.8	94297.9	74970.3	54573.8	70763.7	38384	118786	18160.3	68473.3	77316.7	46645.8	61981.2	4382	8132.81	631.182	1208.07	558.715	727.267
	95	C29 H39 N8 O15 P			770.227	6.946	35741.3	33327.3	35660.5	36913.7	34493.9	36287.1	368.039	419.095	393.567	2605.48	2269.32	2941.65	3145.92	2849.49	3442.35	24746	3178.29	46313.7	2848.87	3371.13	2326.62	3384.72	3619.66	3149.78	3182.67	3394.63	2970.7	3127.69	3285.65	2969.73
	96	C29 H40 N10 O6 S			656.285	1.261	57704.8	57084.1	57313.9	44826.5	57199	51070.2	50882.5	24102	37492.3	3274.43	2499.68	4049.17	4546.38	5328.37	3764.38	5736.51	10221.3	1251.72	756.134	1091.25	421.014	38355.5	17156.6	27756	1093.67	1258	929.336	1161.13	919.698	1402.57
	97	C3 H4 N4 O8 P2			285.949	10.473	35903.4	40033.3	36228.2	41059.5	38130.8	38643.8	33258.9	59228.2	32700.4	8058.17	5484.93	10631.4	23085.8	44723.3	19788.8	37527.2	69195.3	5859.07	19094.2	11093.3	3092.4	23722.3	29783.9	30968.8	7950.47	8756.89	9563.31	20147.6	23838.2	111676
	98	C30 H39 N8 O6 P			638.274	1.267	80007.7	84771.6	81541.1	88638.7	83156.4	85089.9	578382	749962	664172	589182	681327	497038	525629	689724	361534	439331	506775	371887	56223.4	30214.6	4205.81	55535.9	41401.7	27267.5	44750.4	56432.9	50591.6	4793.19	5715.08	3871.31
	99	C30 H41 N8 O16 P			800.238	6.752	7771.05	7883.47	7297.15	10226.4	7590.31	8761.79	426.897	403.804	415.35	1131.5	973.14	1289.86	1305.41	1196.69	1414.12	3253.37	1418.72	5088.03	394.289	1431.35	889.372	453.818	1559.09	1291.32	522.206	1352.55	1203.75	814.57	1406.63	1387.29
	100	C30 H44 N6 S2			552.307	1.385	3868.02	3911.68	3827.39	4073.51	3869.54	3950.45	11697.8	15597	13647.4	2839.21	4102.71	1575.72	3406.73	2323.04	1383.64	1786.91	2333.59	1240.24	4423.3	3837.91	1689.6	3017.7	2572.65	2159.1	4813.34	1417.86	1414.64	6606.25	2870.77	3394.73
	101	C30 H49 N4 O4 P3 S			654.269	1.241	391114	536931	507905	729953	522418	618929	272987	199128	236057	50196.6	60187	40206.2	26728	26054.3	27401.7	34308.7	40685.8	27931.5	5074.79	8378.29	1771.29	47483.5	79530	15437.1	10456.3	16795.8	4116.69	2666.89	4074	6056
	102	C30 H49 N9 O			551.405	1.271	287724	275013	276619	255735	275816	266177	2849.57	3540.42	3195	6852.23	7868.81	5835.66	3065.05	6228.93	7366.15	9544.44	12173.5	6915.36	4033.26	6893.31	2125.21	3118.13	4570.71	6023.29	5795.91	2634.68	4215.3	238697	11887.3	125292
	103	C30 H51 Cl P2			508.317	1.248	1947.21	1376.99	1378.37	2196.21	1377.68	1787.29	1033.83	1284.47	1159.15	2215.58	2112.01	2319.16	850.221	3012.34	1931.28	17271.8	7164.86	27378.7	1181.99	4900.89	676.402	879.648	1494.32	2109	15498.8	1192.46	3857.72	11642.8	10457.6	8628.49
	104	C31 H50 N4			478.402	1.278	75036	73622.9	78268.7	88707.3	75945.8	83488	14031.3	14729	14380.2	7573.08	9882.83	5263.33	39022.7	21562.5	30292.6	35902.6	19996.3	51809	41812.7	50389.2	46100.9	73645.7	40179.5	6713.38	36710.6	49074.2	24346.9	149026	215713	82338.3
	105	C31 H50 O11			598.336	1.382	14574.7	9186.93	15719.6	18488	12453.2	17103.8	2488.47	3032.68	2760.57	69412.2	86879.9	51944.5	25519.4	65536.6	48025.6	97408.5	157639	37178	92470.3	89908.4	95032.2	21573.7	79748.9	50661.3	19992.6	67701.6	65368.5	16207.9	33407.1	24807.5
	106	C31 H56 Cl N8 O12 P			798.345	1.525	647634	564202	655834	512454	610018	584144	1.45794e+06	1.32602e+06	1.39198e+06	16322.6	27638.4	5006.73	25258.5	38119	12398	128275	253592	2957.11	602484	376917	151350	645330	349695	54060.5	509343	267217	25091.5	50248.2	78252.6	22243.8
	107	C31 H75 N9 O3 P2 S			715.516	1.575	44377.5	42213.5	63802.2	54525.1	53007.9	59163.7	30457.2	25205.2	27831.2	151269	170275	132263	171137	214669	127605	200255	277112	123398	62169.8	172469	117320	159700	167410	151990	144734	174665	114802	62314.6	74710.4	49918.8
	108	C32 H17 O P			448.101	5.684	16569.2	12520.6	18743.4	21373.1	15632	20058.2	62153.4	75121.2	68637.3	16838.8	14709.5	18968.2	9776.46	6489.55	13063.4	13249.8	7431.95	19067.6	2379.84	2679.18	2080.5	20592.1	24813.3	16370.8	5312.72	7004.21	13805.8	50933.8	78982.9	22884.7
	109	C32 H32 N10 O4			620.263	1.268	30522.5	35019.2	33475.4	48222.9	34247.3	40849.1	550412	723632	637022	626722	719419	534026	573327	739738	406915	467181	537272	397089	33167	20035.7	6904.38	20959.9	21426.2	21892.5	12681.3	48071.9	30376.6	2056.11	6376.81	5013.47
	110	C32 H63 O4 P3			604.396	1.288	104513	96479.2	86378.4	80259.5	91428.8	83318.9	1019.04	840.123	929.581	7166	3512.48	10819.5	11287.1	11353.8	11220.3	12752.5	15106.3	10398.7	16631.6	11329.7	13980.6	8865.09	8078.74	7292.39	3401.5	5792.94	1010.05	7385.47	13189.3	1581.6
	111	C32 H66 N6 O4 S			630.486	1.284	12088.8	12260	14981.5	11106.8	13620.7	13044.2	2037.25	1546.04	1791.65	68165	42690.3	93639.7	51493.4	43706.9	59279.9	63110.9	41977.3	84244.6	16736	46822.6	31779.3	15689.3	17309	18928.6	75375.2	19979.3	15668.2	29295.3	37406.2	21184.4
	112	C32 H68 N4 O7 P2			682.458	1.211	21917.8	17253.5	21208.8	26255.3	19231.1	23732	36484.6	84247.5	60366	1452.29	1061.29	1843.3	1411.52	900.273	1922.77	4604.63	1069.72	8139.53	8388.91	5042.76	6715.83	16112.9	1732.88	8922.87	59812.9	33502.2	7191.53	11381.2	10982.2	8576.84
	113	C32 H72 N4 O2 P2 S2			670.458	1.228	5092.89	4767.09	4118.93	6149.55	4443.01	5134.24	7332.15	5588.8	6460.47	43340.4	26186	60494.8	61592.4	69477.1	53707.7	66924.2	74257.8	59590.7	889.465	3000.74	5112.02	3418.37	9754.17	16090	41563.4	22265.7	17795.1	25542	72929.8	21954.1
	114	C33 H30 N4 O6 P2			640.164	7.9	68416.4	134621	140252	176699	137436	158475	792159	321698	556928	274116	342813	205418	205837	192818	196240	120561	175737	65384.3	288154	47300.4	167727	177919	177149	107575	65770.9	21784.6	89697.8	121149	78456.1	121313
	115	C33 H66 O2 S5			654.369	1.289	18645.9	18098.5	20829.5	14844.8	19464	17837.1	1348.44	4473.71	2911.08	1961.51	2295.33	1627.69	12846.7	8843.07	6628.24	9953.01	9458.48	10447.5	10962.6	2764.8	6863.71	15304.5	16792.8	16048.6	922.171	1187.82	656.526	837.438	611.929	1062.95
	116	C34 H56 N2 O18 S			812.323	1.359	1686.44	1705.47	2299.95	1898.63	2002.71	2099.29	6162.15	6324.26	6243.21	155342	151837	158847	122617	164663	80570.7	135809	160789	110829	380803	211335	550270	382894	478491	287296	313592	203438	423745	2880.29	126165	64522.8
	117	C34 H58 N8 O17 S			882.365	1.243	33943.6	32899.5	30397.1	26429.2	31648.3	28413.1	28576.1	41746.5	35161.3	2656.34	2028.92	3283.77	9141.48	4919.13	696.77	50667.5	100368	967.08	7619.43	8146.79	8714.17	7561.9	2364.05	4962.98	10845.1	5955.9	8400.52	13384	2725.72	8054.84
	118	C34 H60 Cl N2 O3 P			610.4	1.399	138109	126139	135993	86078.2	131066	111036	194215	121433	157824	5421.17	2532.12	8310.21	63447.7	30423.2	12048.6	24319.5	33242	15397	112359	10678	61518.5	170274	30963	100619	176378	98379.1	20380.6	29254.4	44157	14351.9
	119	C34 H75 N5 O4 S3			713.5	1.206	74919.6	82554.1	72957.1	91283.5	77755.6	82120.3	11604	32431	22017.5	12709.7	10181.8	15237.5	28109.4	12766.5	11890.1	11071.7	15149.4	6993.96	43192.8	9168.18	26180.5	22323.5	18766.8	25880.2	82909.8	74662.9	66416.1	61661.4	17015.3	25028
	120	C35 H39 N6 O3 P iso			622.28	1.284	5324.7	99236.4	105730	114717	102483	110224	36915.9	106503	71709.7	235514	228586	242441	54053.2	64549.9	43556.6	52609.8	27574.6	77645	123440	40343.4	81891.8	30330	43524.1	17135.8	10572.2	18268.8	2875.54	4431.56	5680.96	4339.81
	121	C35 H39 N6 O3 P			622.279	1.165	377532	314071	326027	255041	320049	290534	162007	104584	133296	34747.8	37761.8	31733.9	49443.2	51145.2	47741.3	70392.7	91504.6	49280.8	123440	10282.3	66861.3	186486	286857	236672	164600	33803.6	99201.7	1269.08	3789.88	573.42
	122	C36 H32 N8 O			592.269	1.369	8276.52	10012.3	11602.7	16298.3	10807.5	13950.5	60232.2	127074	93653	2.31004e+06	3.32303e+06	1.29706e+06	926965	1.34697e+06	506956	871918	1.00163e+06	742209	21261.9	33150.3	45038.8	12265.4	32415.1	52564.7	4936.14	6607.07	8278	16638.7	20078.3	13199.2
	123	C36 H38 N4 O5			606.285	1.283	71125.8	70785.1	73995	120347	72390	97171	805422	642565	723994	2.52826e+07	2.94742e+07	2.10911e+07	1.58755e+07	2.07103e+07	1.10406e+07	1.37168e+07	1.70537e+07	1.03799e+07	47720.5	126110	204500	51236.3	1.10597e+06	2.1607e+06	18347.3	39101.1	59855	202150	379878	24422.7
	124	C36 H71 O11 P S			742.442	1.718	26703.7	27051.1	25375.9	39426.2	26213.5	32401.1	147239	138242	142740	13639.1	13686	13592.2	16313.7	6036.93	11175.3	4409.89	2769.37	6050.42	1159.34	1499.77	818.921	13696.1	8378.41	11037.2	3235.51	2414.55	1593.58	5258.55	1089.54	2370.96
	125	C36 H72 N2 O5 P2			674.489	1.196	14331.8	12898.4	14471.6	16982.5	13685	15727	3302.69	2434.97	2868.83	7651.42	3592.16	11710.7	3631.59	8711.07	4841.01	11637.2	7926.29	15348.1	18899.6	7668.77	13284.2	10903.6	7794.17	4684.71	86300.5	6620.56	10980	73981.6	22229.5	48105.6
	126	C38 H38 Cl N O5 S2			687.188	1.163	38805	36759	36085.8	39753.3	36422.4	37919.6	5269.29	4328.58	4798.94	2901.76	3014.8	2788.72	8182.34	7989.94	8374.75	11603.1	18521.2	4685.06	8285.48	1977.63	5131.56	26348.7	18980.6	11612.5	16249.9	14803	9777.32	3893.28	6748.86	1037.7
	127	C38 H40 N8 O S2			688.275	1.254	37206.4	27675.2	55147.5	19042	41411.3	37094.7	8395.82	15931.4	12163.6	12543.1	13859.8	11226.4	1078.74	1458.08	699.399	1143.77	1520.98	766.563	4128.93	982.226	2555.58	1177.97	1337.06	1018.89	728.237	619.988	836.486	1455.4	827.81	1211.44
	128	C38 H40 N8 S2			672.28	1.233	89735.3	82974.4	97316.1	129242	90145.2	113279	62614.7	66819.9	64717.3	13819.9	13816.9	13823	62615.4	21265.5	14234.7	18565.7	22802.3	14329	25817.7	1458.14	13637.9	37418.3	26868.1	32143.2	2277.1	3312.41	1241.78	1511.26	1228.9	1793.62
	129	C38 H46 O5 P2			644.284	1.212	641.048	606.206	730.924	1155.53	668.565	943.229	11642.1	2708.59	7175.33	9322.51	14418.4	4226.63	540.791	1153.55	890.416	927.107	1204.9	649.313	424.841	740.981	341.712	1923.85	2776.43	1071.27	881.753	368.96	881.577	393.265	821.34	848.447
	130	C38 H56 N6 O2			628.447	1.238	2038.3	1556.84	1958.63	1734.63	1757.74	1846.63	714.279	736.153	725.216	4286.02	5241.15	3330.89	7839.39	10277.5	5401.28	12703.3	14379.6	11027	1192.9	7946.28	3041.99	33526.2	57514.5	9537.88	12104.7	10372.6	13836.8	1666.97	4211.17	6755.37
	131	C38 H57 N2 O P			588.418	1.252	13326.9	12580.2	12600.2	23412.2	12590.2	18006.2	897.987	1115.69	1006.84	10182.7	9112.45	11253	5434.13	8976.17	6041.25	9250.85	4255.88	14245.8	8450.56	9678.13	9064.34	15722	45060.2	30391.1	17919.4	8523.38	27315.4	32229.6	65450.6	23248.3
	132	C38 H66 N2 O7 P2			724.431	1.666	13436.9	15168.9	13397.6	18882.8	14283.3	16140.2	108829	98787.9	103809	34227.5	12730.2	16426.4	4323.58	4118.84	1908.42	4449.72	3330.21	5569.22	13047.9	2613.85	2596.32	8398.75	6998.9	5046.75	9995.41	2145.21	4212.32	5386.96	3035.89	6721.18
	133	C38 H69 O9 P			700.469	1.219	4487.61	4813.24	3399.46	6678.36	4106.35	5038.91	37932.1	32330.5	35131.3	7032.21	3440.02	2595.52	2003.6	3438.94	2612.14	6226.79	2948.8	9504.77	2670.53	4509.11	4814.69	4814.69	9909.38	3271.8	5002.94	1410.21	8166.06	620.844	3554.43	6488.02
	134	C38 H84 N9 O11 P3 S			967.522	1.756	646101	611735	666536	1.15862e+06	639136	912580	2.6108e+06	1.77015e+06	2.19048e+06	485806	509372	462239	351278	380342	322214	480852	308076	653627	612360	480644	744075	426969	523725	330214	985756	392677	578339	547833	589117	506549
	135	C39 H67 O16 P S2			886.361	1.3	9327.77	15361.1	9526.22	8616.49	12443.7	9071.36	31689.8	121147	76418.3	47091.3	32723.2	61459.5	38776.5	42839	34714.1	42552.8	52296.2	32809.5	71853.6	51128.7	92578.4	3342.01	66205.6	34773.8	5330.63	33791.8	19561.2	7316.21	37783.4	22549.8
	136	C39 H69 N4 O5 P3			766.451	5.248	297354	309736	314701	358628	312218	336665	674189	234968	454579	43322.4	53404	33240.8	24133.9	32790.2	15477.6	23728.1	28324.6	19131.7	20994.3	38115.7	3872.87	1.54415e+06	200178	872165	28917.9	30240.2	27595.6	13072.3	15870.7	10274
	137	C39 H77 P S4			704.464	1.217	33732.8	31992.2	34464.1	39978.7	33228.1	37221.4	34948.7	34703.1	34825.9	3364.22	2137.31	4591.12	3189.9	2170.39	4209.42	5353.05	1701.34	9004.76	1786.36	3236.88	335.848	30959.3	15394.1	23176.7	1708.48	991.226	2425.73	3414.94	2555.91	1696.89
	138	C4 H Cl2 N6 O6 P			329.908	7.711	221157	96027.7	60443.7	68993.3	78235.7	64718.5	99612.7	176578	138096	485626	410470	560782	765401	768463	762340	526706	655976	397435	154832	82452.8	10073.6	169838	161111	364343	432012	547527	316497	225561	182451	134981
	139	C4 H11 N10 O2 P			262.08	9.427	16143.3	15730.9	14858.9	16122.8	15294.9	15490.8	8719.65	10341.7	9530.67	28755.6	24944.7	32566.6	72340.2	71166.7	73513.7	77373.4	101031	53716.2	8069.71	100942	77172	77172	92013.7	62330.3	6133.11	24570.2	43007.4	128953	148921	108985
	140	C4 H13 Cl N2 O13 P2			393.958	9.125	10365	9040.21	8437.89	9468.15	8739.05	8953.02	6450.67	3049.24	4749.95	10399.9	5326.89	15472.9	12879.6	5070.34	20688.9	15846.2	23690.3	8002.11	1059.48	871.685	683.887	58120.5	52416.8	63824.1	10810.6	20609	30407.4	12636.5	164527	22270.4
	141	C4 H7 Cl N6 O9 P2			379.943	9.168	16370.7	14344.9	13151.2	12222.6	13748.1	12686.9	9095.1	3761.99	6428.54	23003.5	25076.4	20930.6	36277.3	42595.7	29958.9	53664	82852.2	24475.9	2217.13	1428.13	639.129	9726.64	22287	34847.3	9972.95	11728.9	13484.8	10425.3	75371.2	12947.1
	142	C40 H60 N6 O3			672.474	1.228	5608.62	5271.5	4774.55	5854.66	5023.03	5314.61	8793.34	4558.39	6675.86	26092.1	18958.1	33226	37999	43390.1	32608	44682.3	49221.3	40143.4	10987.9	33142.2	9454.62	9454.62	17961.6	26468.7	19603.7	36208	23664.1	10813.9	62720.7	21014.3
	143	C41 H50 N10 O			698.415	1.245	2858.52	2698.34	1524.7	3072.85	2111.52	2298.77	18314.6	18926.7	19010.5	10720	6732.21	14707.9	14732.2	21224.1	8240.22	18997.3	8134.43	29860.1	1307.47	10981.2	973.029	973.029	2255.67	3538.31	3291.64	3666.43	2010.86	1183.37	7734.13	902.326
	144	C41 H68 N9 P			717.532	1.2	92636.7	82873.2	94772.5	128433	88822.9	111603	7941.26	5265.61	6603.44	190528	139329	241727	145147	135188	155107	129466	182633	76298.4	20207.2	97644.6	162319	162319	123179	201459	54250.9	61546	57898.5	141059	137455	144664
	145	C42 H60 N6 O4 S4			840.355	1.332	432369	429548	476871	415261	453210	446066	570881	394538	482710	47315.6	34151	60480.3	271637	131901	29799.5	172061	185848	158274	73573.2	76604.5	70541.8	261425	202673	143921	64183.7	58311.3	70056	310847	356653	402459
	146	C42 H76 N7 O7 P3			883.501	5.196	6.70384e+06	6.86389e+06	6.76246e+06	7.75851e+06	6.81318e+06	7.26049e+06	1.97389e+06	2.31402e+06	2.14395e+06	272635	246637	298633	205764	214353	197176	214505	204280	224731	158972	232646	85298	597064	642665	551463	513136	233656	792616	779779	793213	766345
	147	C46 H91 O15 P3 S			1008.53	1.386	103860	128826	138441	186921	133633	162681	1.02661e+06	731279	878943	626587	418109	209631	61565.4	52892.8	70238.1	157347	42693.8	272000	201110	373760	546410	276945	265605	271275	211990	211017	210044	218622	333685	289532
	148	C5 H Cl O9 S3			335.846	18.143	243887	218558	190306	362318	204432	276312	230433	301761	289008	150086	263971	118320	154888	394614	218301	233973	281645	186302	188889	160203	159353	159353	219222	189288	142600	216456	74418.5	240379	249310	258242
	149	C5 H13 O6 P			200.045	6.988	23480	18701.4	19015.3	19351.3	18858.4	19183.3	2612.23	753.834	1486.6	2231.67	967.745	1297.31	1345.02	1221.73	1468.31	4004.02	6628.69	1379.36	5494.21	1435.13	1351.09	2647.26	2299.56	1364.38	32325.8	16400.6	17262	32994.3	33220.8	17495.7
	150	C5 H14 N9 P			231.111	7.852	4850.77	3689.15	4256.67	4739.14	3972.91	4497.91	915.098	1755.7	1335.4	1066.58	2599.62	4132.66	1165.89	6842.56	6997.19	136386	135378	137393	864.012	729.797	595.582	4013.23	6609.25	9205.27	44506.8	75911.6	13102	24007.6	17403.3	30264.9
	151	C5 H2 N6 O5			226.009	10.584	14899.1	18408.2	13384.4	32432.1	15896.3	22908.3	24218.8	19512	21865.4	15567.6	46850.6	11712.5	37785.9	53113.5	22458.2	51184.4	48347.2	54021.7	22849.2	31358.9	14280.3	14280.3	20328.7	17304.5	11649.1	7182.12	2715.12	5819.17	5309	6329.34
	152	C5 H2 N6 O8 P2			335.942	10.197	41612	40130.5	43365.8	38108.8	41748.1	40737.3	80357.3	74342.3	77349.8	54343.1	69238.6	84134	36516.6	105798	87390.4	77037	150116	3958.23	34346.8	41068	34818.4	34818.4	29414.8	11871.1	10388.5	81820.3	46104.4	24732.7	24517.9	24303.1
	153	C5 H3 Cl N5 O5 P			278.955	9.048	59944.1	60318.4	50230.4	44708.5	55274.4	47469.4	76193.1	76738.5	52785.3	70250.4	49865.7	58859.7	81583.5	52917.9	67224.6	64838.5	71214.2	58462.9	99467.6	44358.5	72526.9	72526.9	30810.2	15073.5	33364.5	19735	13478.3	32996	26747.8	19820.8
	154	C5 H7 Cl O15			341.948	10.818	12175.5	13330	12982.9	20739.5	13156.5	16861.2	23454.5	51664.9	40606.7	4615	9019.09	5906.4	8727.36	27164.6	45601.8	82591.9	137646	27537.5	10238.1	101282	7638.08	7638.08	6123.11	4608.13	464.663	1428.66	2392.65	2356.47	10382.3	6369.39
	155	C5 H7 N4 O4 P			218.019	7.621	182461	65781.4	157453	88296.8	111617	122875	40036.4	58233.5	49135	107862	154554	562429	33994.6	107195	70594.7	209832	158261	261402	45725.7	117057	478462	478462	409884	547041	399978	213911	586045	207246	311155	259200
	156	C5 H9 Cl O13			311.973	10.859	73571.2	62857.9	67109	103870	64983.5	85489.2	156028	148556	152292	215472	248323	182620	80078.1	111530	142983	351569	491961	211178	67604.1	342769	351483	351483	557239	145727	256080	409243	102918	206287	182503	230070
	157	C6 H10 Cl N2 O7 P3 S			381.911	9.821	620090	472074	462956	462996	467515	462976	400669	452270	426470	335827	3.27237e+06	4.17875e+06	3.34566e+06	2.72059e+06	3.97074e+06	3.60365e+06	2.80653e+06	4.40077e+06	481828	3.35593e+06	2.41123e+06	2.41123e+06	2.27891e+06	2.54356e+06	2.78198e+06	2.69167e+06	2.87229e+06	2.42333e+06	1.47275e+06	3.37392e+06
	158	C6 H10 N2 O5 S5			349.92	10.79	25492.2	25508.2	31273	36286.4	28390.6	33779.7	49208	60745	60663.2	24640.6	29203.2	16886.5	23862.9	46777.2	18881.4	45954.1	78934.6	12973.7	24319.9	34629.7	27413	27413	73552.2	50482.6	1620.02	2023.52	2427.03	7915.93	2061.57	8573.69
	159	C6 H11 N2 O4 P3 S			299.965	10.142	58080.6	56996.9	59200.8	55530.8	58098.8	57365.8	109979	98138.4	104059	490952	431168	550736	385504	362359	408649	269899	455474	84324.2	47588.5	271035	48918.2	48918.2	61664	74409.9	15073.8	29165.4	43256.9	123339	106277	140401
	160	C6 H12 N3 P3 S			250.996	9.435	6790.49	6448.83	5770.76	7296.53	6109.8	6533.64	21345.4	15631.7	18488.5	642999	844758	441240	158173	188602	127745	213810	381026	46594.5	3308.08	2654.69	2001.29	3373.7	17945.3	32516.8	1954.43	8737.36	15520.3	5689.09	4853.07	6525.11
	161	C6 H14 N8 O4			262.114	8.024	5633.42	4153.75	4879.75	4270.59	4516.75	4575.17	12541.9	22739.9	17640.9	6274.39	6831.76	7389.14	1220.52	3809.62	6398.72	13771.6	19349.7	8193.44	1680.04	8128.36	1346.67	1346.67	6262.99	6592.06	1053.72	3148.52	5243.33	1724.98	4282.91	6840.85
	162	C6 H17 N10 P			260.137	7.955	64746.5	59009.4	54757.9	60814.5	56883.7	57786.2	47379.3	35635.9	41507.6	146011	162261	129761	37607.2	40842.3	44077.5	227200	354531	99869.3	39427.4	216425	27210.4	27210.4	23784	20357.6	39746.6	22933	56560.2	121864	138919	226291
	163	C6 H3 N4 O5 P			241.983	10.565	165464	161242	166597	181543	163920	174070	512877	490943	501910	268392	392987	199029	147788	250051	352313	780008	795745	764271	147822	445755	134915	134915	319159	227037	35818	33442.8	31067.6	72887.5	67972.1	109583
	164	C6 H7 N5 O8 P2			338.976	9.024	26519.6	33653.7	18876.6	19631.6	26265.1	19254.1	28089.8	33297.5	30693.7	1.93632e+06	1.78501e+06	2.08764e+06	2.41735e+06	2.69693e+06	2.13778e+06	2.72032e+06	2.9929e+06	2.44774e+06	39825.7	40255.2	40684.7	31309.3	405462	779614	15846	343893	671940	1.20975e+06	1.44612e+06	973371
	165	C6 H9 N4 O4 P			232.035	7.697	5429.73	8344.78	6877.32	7132.67	7611.05	7005	7309.83	3939.68	5624.76	11545.8	270837	330744	393399	355366	431432	349710	481579	217841	3971.56	3857.45	3743.34	3896.9	422425	213161	247190	324474	169907	217572	133324	301819
	166	C7 H16 O10			260.076	8.833	30560.1	27248.5	26734.6	25872.9	26991.5	26303.7	18840.6	60132.1	39486.3	5028.64	5981.35	6934.06	7323.01	6732.81	6142.6	31010.8	44489.3	17532.3	7304.18	4389.77	1475.37	4844.01	4740.99	7091.51	2064.11	11644.1	8318.94	3623.51	12454.4	19942.4
	167	C7 H21 Br Cl N7 O3			365.057	8.55	19528.8	15677.3	11654.5	4542.35	13665.9	8098.41	120320	105718	173072	25636.4	42450.8	43118.8	28065.4	45782	34217.9	71329.5	108275	34384.2	32076.9	38449.9	19566.8	19566.8	32179.3	25873	41692.4	49330.4	45511.4	21100.9	10678	12304.4
	168	C7 H3 Cl4 N6 P3			403.84	7.739	53094.8	4555.33	17018.9	5921.15	10787.1	11470	6010.2	67276.7	36643.5	197635	184072	211198	46860.7	78540.9	110221	179625	198293	160957	62419.9	221690	61915.9	61915.9	65513.2	63714.5	187242	212371	162113	13554.4	86655.9	56516.4
	169	C8 H12 Cl N2 O4 P3			327.968	9.829	23984.8	22130.4	25597.3	20904.8	23863.9	23251	32290.9	22418.7	27354.8	187328	144398	230258	14196.9	67874.9	41035.9	147091	117858	176324	16619.4	112111	13143.4	13143.4	48056	55632.1	78930.4	92103.9	65757	61738.7	23770.7	99706.7
	170	C8 H13 O9 P			284.03	2.354	31217.1	40153	29619.2	932.557	34886.1	15275.9	4181.42	5545.25	4863.34	1334.13	760.197	1908.06	6346.78	5093.74	7599.82	8775.54	6369.93	11181.1	3995.87	5185.96	2805.78	20990.2	20242.9	18027.7	32038.4	85568	97162.4	166838	159812	173863
	171	C8 H25 N6 O3 P3 S			378.093	8.245	63810.2	72263.1	65633.6	81299.7	68948.4	73466.7	38478.9	34078	36278.5	157428	149119	140810	75783.9	71064.9	110814	124477	173355	75597.7	128869	53254.9	52050.8	52050.8	55021.3	57991.7	54453.5	220817	137635	169953	268936	367919
	172	C8 H6 Cl N8 O8 P			407.974	9.06	29846.1	29792.6	27980.1	26544.1	28886.4	27262.1	23135.9	12824	17980	5038.93	4421.84	4730.38	2550.14	2809.8	2679.97	11444.2	13416.4	9471.99	2664.75	13387	14773.4	14773.4	54590	34681.7	43714.3	62954.3	82194.2	49403.9	48746.1	48088.3
	173	C9 H14 N5 O5 P			303.074	8.509	184905	138202	176203	154047	157202	165125	246445	242533	244489	54891.2	47437.8	62344.6	68943.5	35037.8	75248.2	58441.4	64782.1	52100.6	111582	39364.6	71368.9	71368.9	21722.6	49840.8	83387.5	25567.7	22492.6	10582.4	9813.97	6980.01
	174	C9 H15 N O7			249.085	8.664	11285.8	7017.72	5664.43	6065.25	6341.07	5864.84	31686.5	21245.4	10804.4	39101.8	50048.4	28155.3	74179.4	55127.7	93231.1	122098	65954.8	178242	3331.95	6018.43	8704.9	3787.59	3516.95	3246.3	3869.08	3552.52	3235.97	4009.1	6137.01	5073.06
	175	C9 H15 N2 O8 P			310.057	8.811	8180.48	7393.49	6642.11	7960.59	7017.8	7301.35	601363	233016	969711	9820.61	33245.7	56670.8	64509.6	111499	17520	30607.1	47102.9	14111.2	5509.69	9987.15	6710.72	6710.72	6614.66	3719.67	5966.51	4597.24	3227.98	7381.47	7148.61	6915.74
	176	C9 H6 Cl2 N2 O2			243.981	10.567	9177.73	9323.76	9082.22	10301.1	9202.99	9691.66	26787.2	25368.8	26078	15046.9	10982.3	6917.83	51346.6	70593.2	32099.9	68102	72855	63349	8479.7	4791.89	1104.08	7584.11	6184.91	4785.72	2225.78	3050.02	3874.26	4310.11	6615.16	8892.19
	177	C9 H9 N4 O P3 S			313.971	10.861	12373.7	12376.3	11612.1	16275	11994.2	13943.5	26513.6	24102	25307.8	13760.9	30047.6	23265.8	14256.9	47013.1	17431.7	40683.6	64397	16970.1	11703.4	35747.3	14464.7	14464.7	57191.5	14103.9	3390.53	8131.54	12872.6	6923.38	16849.3	11886.3
HILIC_neg	1	C36 H38 N4 O5			606.285	1.289	32620.9	31208.4	30183.5	43873	31914.7	37028.2	399031	402584	400808	2.15583e+07	2.50924e+07	1.80242e+07	1.39704e+07	1.7314e+07	1.06268e+07	1.11503e+07	1.20032e+07	1.02974e+07	330653	439066	222239	1.62808e+06	1.75113e+06	1.50503e+06	6484.97	19381.5	32278	1422.28	6574.74	11727.2
	2	C29 H61 Cl N6 O13 P2			798.345	1.538	923585	879070	762797	865524	901328	814160	1.59524e+06	1.68766e+06	1.64145e+06	15985.4	16401.6	15569.2	66365.3	88095.5	44635.1	21853.8	40048.9	3658.65	97812.7	46502.7	149123	25364.2	4406.46	46322	60390.9	76643.8	44137.9	1.33402e+06	862964	391912
	3	C4 H5 Cl N4 O11 P2			381.911	9.877	503543	376639	416453	533030	440091	474741	578429	503026	540727	4.39991e+06	3.96447e+06	4.83535e+06	3.73734e+06	3.49966e+06	3.97502e+06	3.95118e+06	3.75615e+06	4.14622e+06	410335	234009	57682.7	2.41022e+06	2.55114e+06	2.2693e+06	3.41314e+06	3.07041e+06	3.75587e+06	2.39329e+06	1.80818e+06	2.9784e+06
	4	C41 H58 N6 O7 P2 S			840.355	1.31	595650	565259	602988	524448	580455	563718	710766	471929	591347	46825.4	36737.4	56913.4	75086.3	123994	26179	177522	163368	191676	52381.3	20972.6	83790.1	335777	236234	136690	82007.3	54301.6	109713	367869	356040	344212
	5	C24 H56 N9 O4 P			565.42	1.304	877787	954651	965655	1.05935e+06	916219	1.0125e+06	12974.6	4261.75	7156.18	10026.5	7373.68	3918.06	12760.9	5531.44	2909.08	4712.4	5630.22	3794.57	1838.51	1147.38	2529.64	5726.02	3492.27	7959.76	71016.9	2234.4	36625.7	1.88736e+06	2.84661e+06	3.80586e+06
	6	C45 H75 N8 O13 P			966.519	1.949	2.31875e+06	2.13468e+06	2.12159e+06	2.87495e+06	2.22672e+06	2.49827e+06	976104	2.92601e+06	1.01317e+06	3.09812e+06	1.2736e+06	1.44804e+06	3.42494e+06	1.06338e+06	1.14501e+06	709440	80799.8	1.33808e+06	1.66147e+06	1.41398e+06	1.16649e+06	2.70475e+06	1.62887e+06	1.20306e+06	1.54139e+06	893368	245348	450347	822913	539586
	7	C19 H38 N O4 P			375.252	1.298	28592.6	27593.9	27385.2	34291.8	28093.2	30838.5	54308.4	40389	47348.7	859804	821374	898235	1.26824e+06	1.1227e+06	1.41378e+06	1.83684e+06	1.96604e+06	1.70764e+06	51499.4	52627.3	54831.4	47135.2	283141	519146	680273	866773	493774	97383.7	426925	756467
	8	C12 H20 N10 O7			416.153	9.238	40861.4	39230.2	46470.5	27923.7	40045.8	37197.1	54901.2	49950.6	52425.9	133137	221438	645419	42553.4	95554	130400	146230	107237	185223	1958.69	2070.86	1846.51	26299.1	17159.3	8019.63	8407.2	10256.8	7072.83	17751.3	15525.3	12615.4
	9	C36 H36 N4 O6			620.263	1.267	7059.9	6530.13	8935.68	14001.2	6795.01	11468.5	146833	333368	240101	350526	392187	308864	343811	440066	247556	223522	229394	217650	13710.6	14629.1	14169.8	15025.8	42039.7	17235.1	7176.47	4322.77	1469.07	560.817	957.243	1495.83
	10	C36 H34 N8 S2			642.233	1.266	128080	137384	138010	91275.4	132732	114643	1.51175e+06	605706	1.05873e+06	40971.2	44042.6	37899.8	95812	32057.9	32556.3	38451	38612.2	38289.8	1711.4	2438.53	984.264	65386.4	46173.9	55780.2	3736.47	5940.71	1532.23	4381.49	1168.46	1559.2
	11	C6 H11 O4 P S2			241.983	10.616	188226	179312	188543	154845	183769	171694	404262	361676	382969	245744	774439	563064	140342	586660	303290	829302	658922	999681	5724.15	5586.65	5861.66	126269	84965.8	43663	37154.9	57206.6	77258.3	55736.8	165010	184182
	12	C16 H9 N5 O2			303.074	8.572	283468	368851	330155	163853	326159	247004	350469	366409	358439	356948	113367	146139	156220	88369.5	132569	57007.9	107257	6758.39	3052.05	1731.22	4372.88	113003	44187.1	85958.7	98126.2	32190.9	36652.6	31505	11134.9	8074.29
	13	C10 H11 N6 O4 P			310.057	8.826	4218.86	4793.08	5031.86	4381.04	4505.97	4706.45	75520.2	246703	161112	344382	620207	68556.8	55804.7	87586.9	24022.6	34622.3	53832	15412.6	2174	1144.38	1583.22	8911.6	10384.8	7438.41	2634.11	5853.58	9073.05	2571.59	6882.67	11193.8
	14	C47 H77 N8 O14 P			1008.53	1.367	160587	158656	158052	179026	159622	168539	719232	525189	622211	385325	115668	175985	59452	51210.7	67693.2	144094	44883.8	243304	145698	70055.5	107877	170966	267267	219117	90563.3	96815.4	103068	125495	329109	306803
	15	C41 H65 N8 O4 P S			796.461	5.184	246965	276649	329927	459899	261807	394913	287998	242999	198001	412328	460555	182910	231500	157576	194538	116744	104682	128807	27935.4	27887.3	27983.6	774292	138764	247003	821000	100285	138228	246175	106116	56210.6
	16	C34 H43 N2 O7 P			622.279	1.214	184376	186520	131249	262902	185448	197076	263726	132940	198333	202906	211774	194038	86030.2	104093	67967.6	118285	191778	44793	2608.77	3383.26	1834.28	60253.1	73572.8	46933.5	189038	36638.9	112838	5539.85	4218.79	4879.32
	17	C17 H25 N5 O11			475.154	9.188	77089.6	74015.6	79489.8	77922.5	75552.6	78706.2	4339.11	4815.69	1802.51	16856.4	16071.5	15286.6	18450.6	6906.64	13168.9	10370.6	11926.3	8814.79	10992.3	7021.65	3051.01	38903.1	77138.2	23849.3	38778	64801.9	90825.8	64342.4	105949	85145.5
	18	C18 H32 N2 O16 S			564.148	8.617	29068	3443.71	39426.9	10368.2	16255.8	24897.6	215428	188012	242844	365311	197081	533541	236742	119367	354117	92587.5	156767	28407.8	1832.54	1744.7	1656.86	2275.3	5689.7	4122.2	2506.31	15166.8	4168.55	2520.75	5175.01	7829.28
	19	C12 H18 Cl3 N6 O5 P S2			525.958	8.529	415239	414795	458513	394980	415017	426747	490734	474952	482843	120478	81708.2	159249	155183	137322	173044	2813.23	2532.01	3094.45	3155.56	1432.74	4878.37	423379	103685	263532	435046	139482	287264	100088	72182.6	127993
	20	C21 H33 N5 O10			515.221	6.646	120291	136242	119397	80481.2	128267	99939.1	4420.36	6986.99	1853.74	792.228	699.541	884.916	1034.8	923.935	1145.67	1257.59	1393.55	1121.62	715.755	724.06	707.449	8647.09	19718	14182.6	32594.8	39652.6	45884.1	260865	166308	126215
	21	C24 H32 N6 O6 P2 S			594.159	5.964	27450	42005.1	50164.2	67030.6	34727.5	58597.4	13663.4	17010.9	15337.1	4320.25	6111.45	2529.05	7704.06	11373	4035.16	106286	48625.1	163947	1201.01	1170.76	1231.25	158717	259738	209228	3787.5	5081.98	2493.02	3382.62	3864.27	2900.97
	22	C27 H24 N4 O10			564.148	9.097	41337.1	51821.4	48380.9	36044.2	46579.2	42212.6	190353	127376	253330	236945	187186	286705	145297	115728	174867	94818.5	155926	33710.8	961.44	1135.79	787.092	3202.01	5038.56	2230.51	2272.92	2880.89	3488.86	2778.14	3949.52	5120.91
	23	C7 H2 N6 O4			234.014	8.883	72432.4	79595.4	77412.8	84277.8	76013.9	80845.3	26885.6	41390.5	34138	1239.41	1202.5	1276.32	1292.09	1324.95	1259.23	1119.56	1070.02	1169.09	506.268	350.686	661.849	44573	14888.4	29730.7	4812.37	2785.74	18601.5	99481.3	17549.3	58515.3
	24	C13 H22 N2 O4 P2 S			364.077	7.742	34218	34788.1	36607.1	26511	34503.1	31559	2410.81	1806.19	2108.5	59766.4	46478.6	73054.1	74101.5	64553.4	83649.5	64375.1	78461.8	50288.4	1379.58	1175.27	1583.89	27683.8	91838.7	48877.9	22984.4	38177.6	53370.8	25146.1	44767	34956.6
	25	C23 H35 N5 O16			637.207	9.216	27867.9	29560.2	28384.5	22734.8	28714.1	25559.6	903.203	774.603	1261.63	1261.99	948.559	1575.42	912.654	1162.41	662.902	773.031	852.706	693.356	320.462	311.844	329.08	11887.7	24627.5	18257.6	5771.43	6421.94	7072.45	37132	22333	69266.4
