# Supplementary material for: Study of the dynamic changes in the chemical constituents of Soapberry (Sapindus mukorossi Gaertn.) pericarp during fruit development by a non-targeted metabolomics approach
Source: Research Square preprint supplement (doi:10.21203/rs.3.rs-148385/v1), 2021-01-20
Supplement: Supplementary file 3 [file 721cb54e82db642f923762aa.docx]

**Study of the dynamic changes in the chemical constituents of Soapberry (*Sapindus mukorossi* Gaertn.) pericarp during fruit development by a non-targeted metabolomics approach**

Yuanyuan Xu1,2,3, Gao Yuan1,2,3, Zhong Chen1,2,3,4, Guochun Zhao1,2,3, Jiming Liu1,2,3, Xin Wang1,2,3, Shilun Gao1,2,3, Duanguang Zhang5, Liming Jia1,2,3⁎

1 Key Laboratory of Silviculture and Conservation of the Ministry of Education, College of Forestry, Beijing Forestry University, Beijing 100083, China;

2 National Energy R&D Center for Non-food Biamass, Beijing Forestry University, Beijing 100083, China;

3 National Innovation Alliance of Sapindus Industry, Beijing Forestry University, Beijing 100083, China;

4 Beijing Advanced Innovation Center for Tree Breeding by Molecular Design, Beijing Forestry University, Beijing 100083, China;

5 Yuanhua Forestry Biotechnology Co., Ltd, Sanming 354500, China

These authors contributed equally: Yuanyuan Xu, Yuan Gao.

⁎Corresponding to: Professor Liming Jia, Ph.D.

College of Forestry, Beijing Forestry University, 35 E Qinghua Road, Beijing 100083, China

E-mail address: jlm@bjfu.edu.cn (L. Jia).

Tel.: +86-010-6233-7055

E-mail address of other authors: yuanyuanxu_2016@163.com (Y. Xu); [gaoyuan@bjfu.edu.cn](mailto:gaoyuan@bjfu.edu.cn) (Y. Gao); sharazhonger@126.com (Z. Chen); zhaoguochun1122@126.com (G. Zhao); 18289143108@163.com (J. Liu); [1796850445@qq.com](mailto:1796850445@qq.com) (X. Wang)；gaoshilun7@sohu.com (S. Gao); [774629608@qq.com](mailto:774629608@qq.com) (D. Zhang).

**Supplemental file 2:**


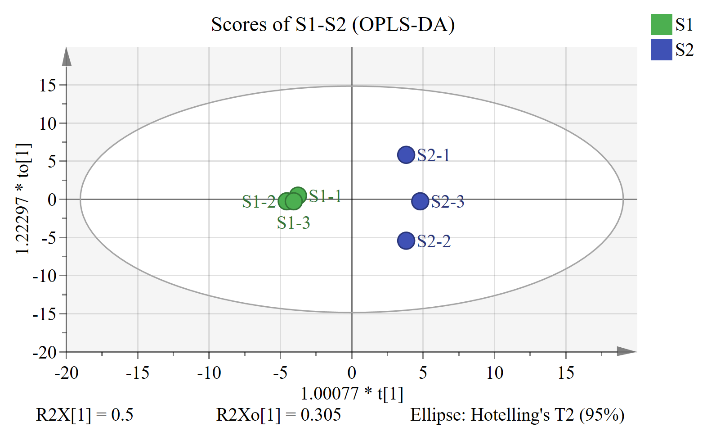

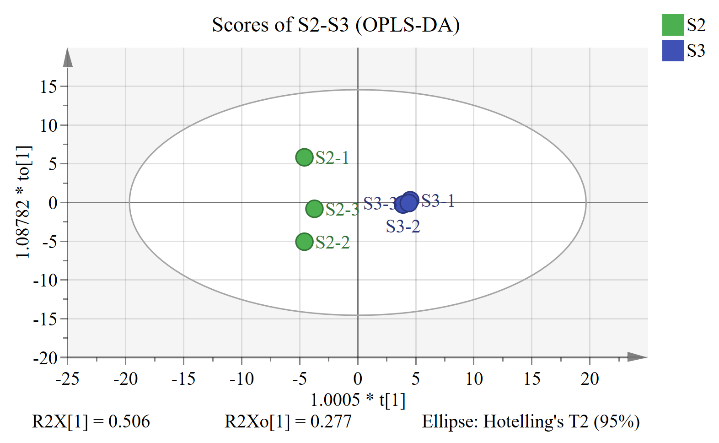


A.S1-S2 B.S2-S3


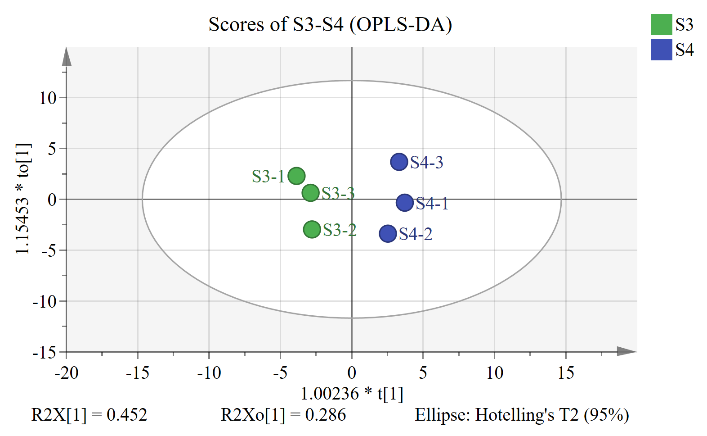

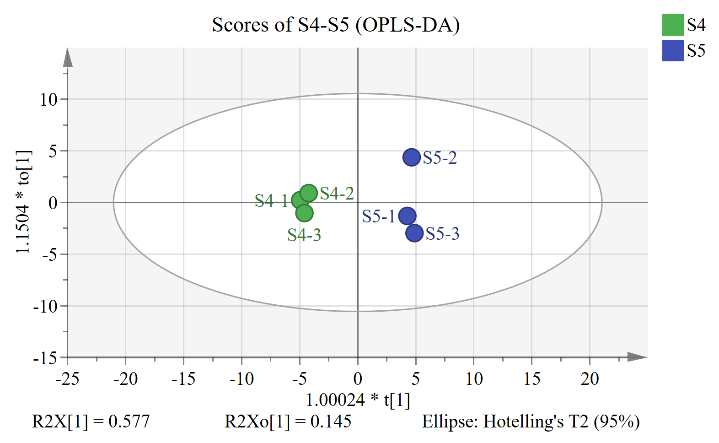


C.S3-S4 D.S4-S5


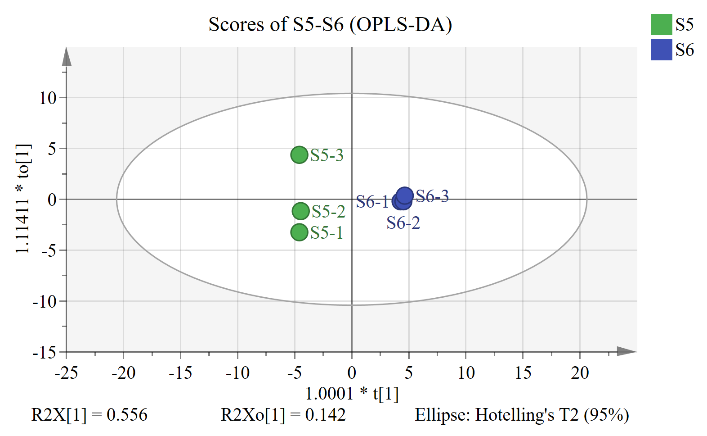

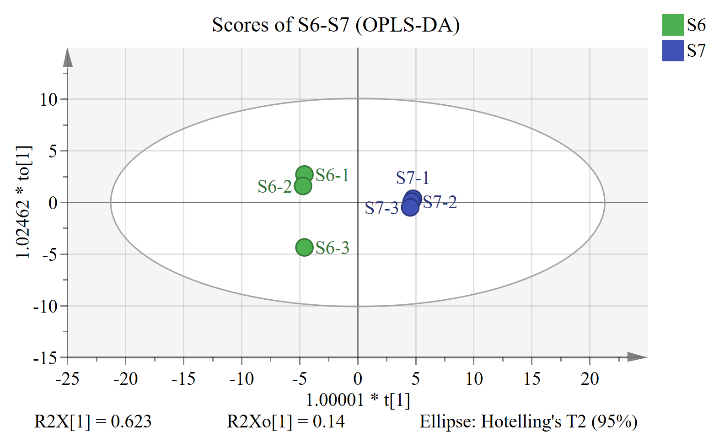


E.S5-S6 F.S6-S7


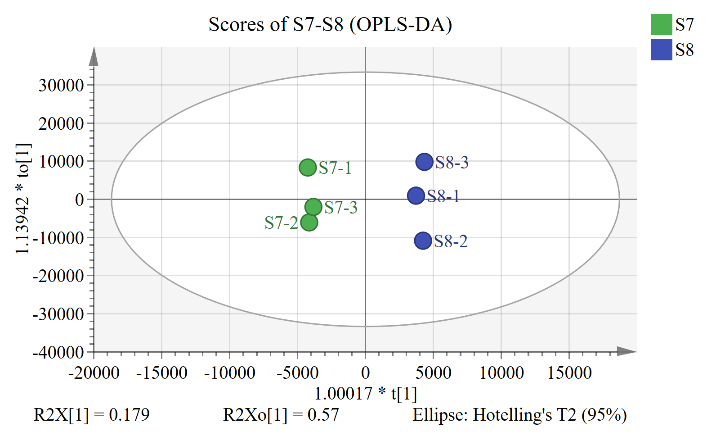


Fig. S1 OPLS-DA score plot


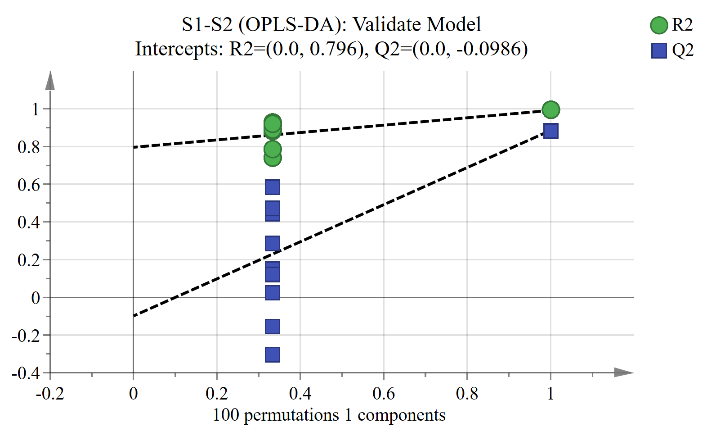

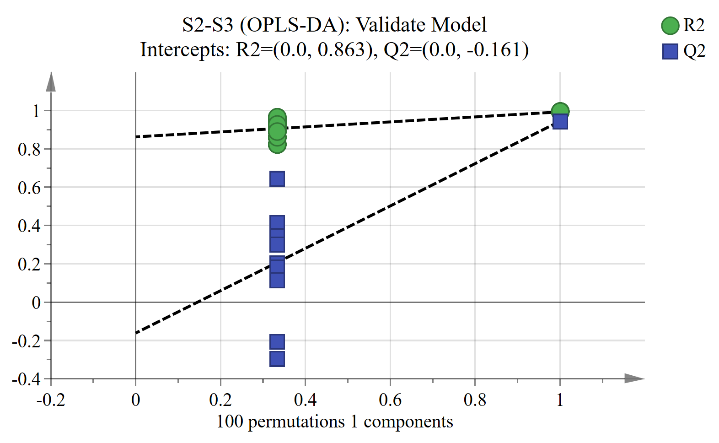


A.S1-S2 B.S2-S3


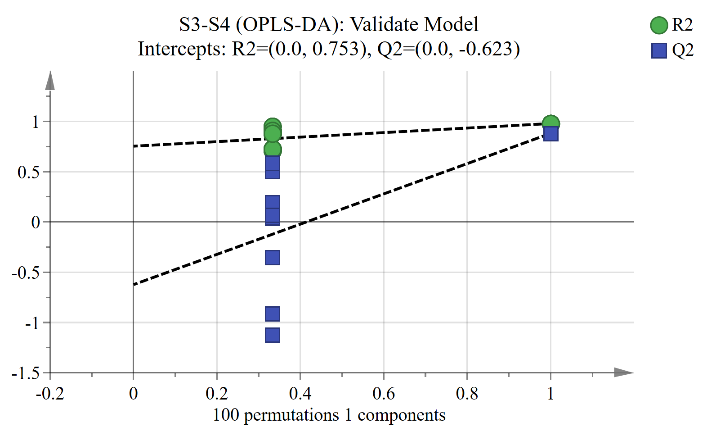

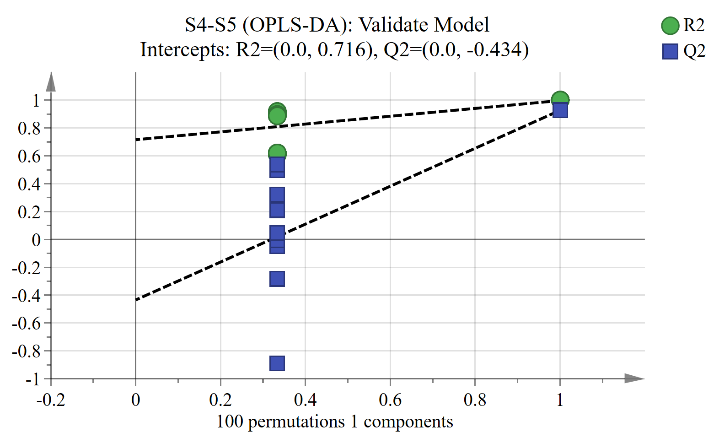


C.S3-S4 D.S4-S5


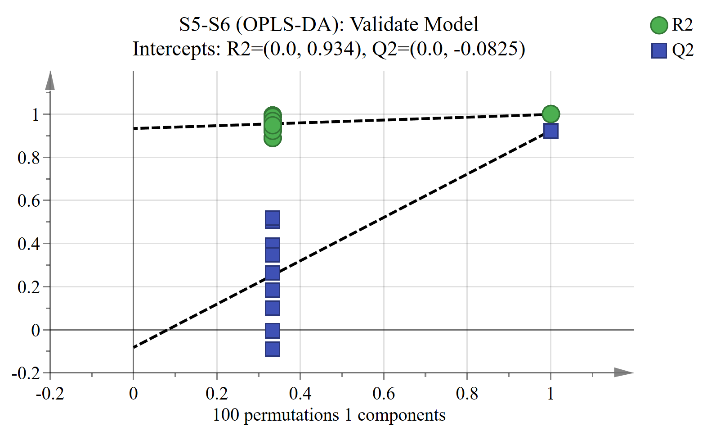

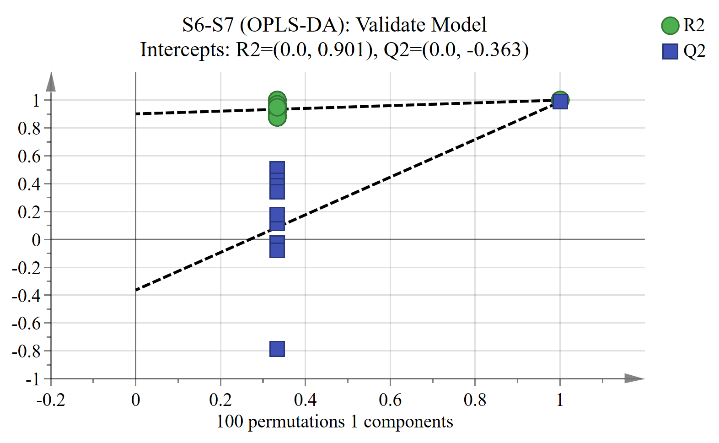


E.S5-S6 F.S6-S7


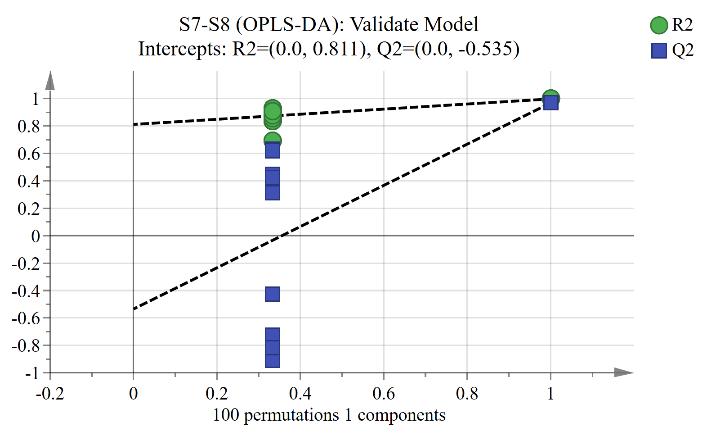


G.S7-S8

Fig. S2 OPLS-DA permutation test graph


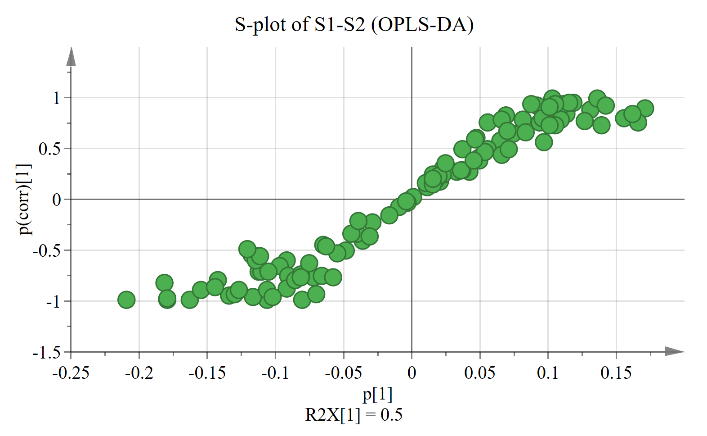

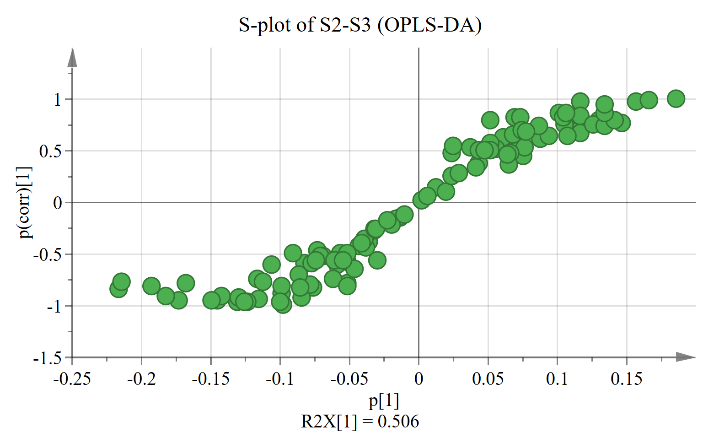


A.S1-S2 B.S2-S3


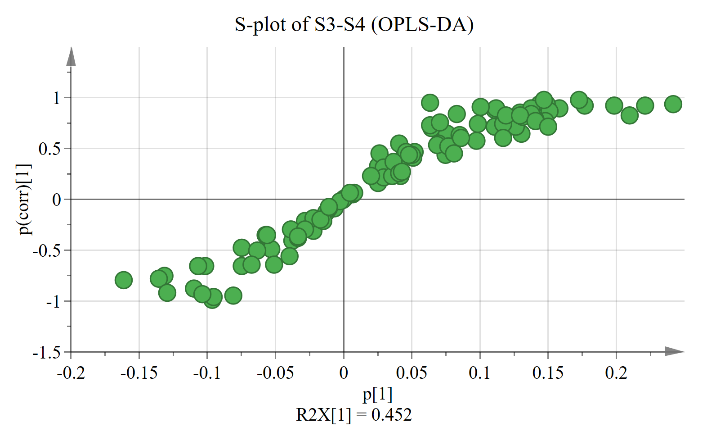

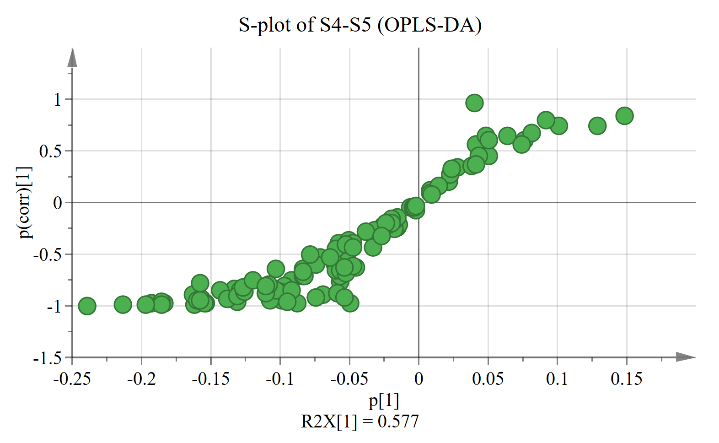


C.S3-S4 D.S4-S5


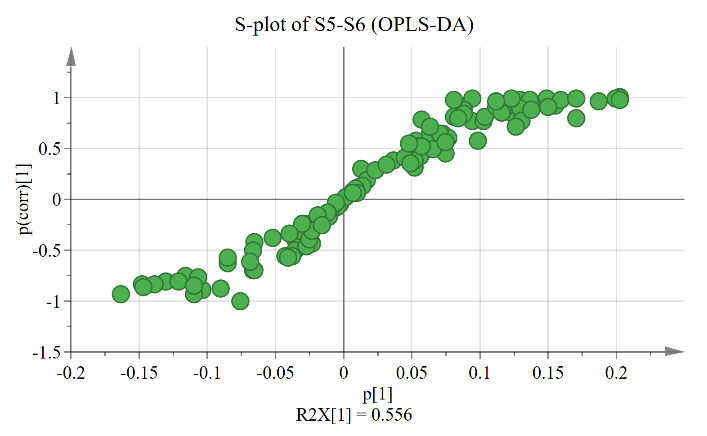

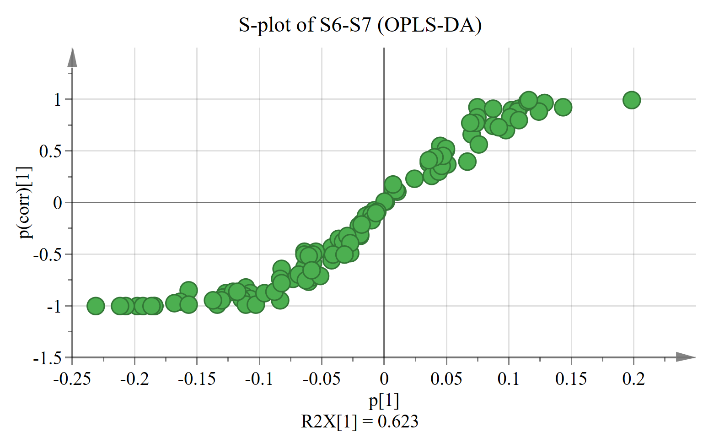


E.S5-S6 F.S6-S7


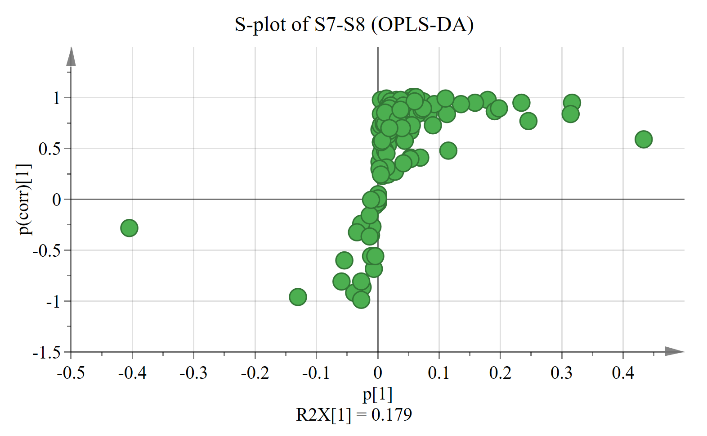


G.S7-S8

Fig. S3 OPLS-DA S-plot graph

Table S1 Annotated compounds

| Test type | No | Name | RT /min | Molecular Formula | Monoisotopic mass/Da | Molecular Weight/(g/mol) | Classification |
| --- | --- | --- | --- | --- | --- | --- | --- |
| C18_neg | 1 | Quercitrin | 7.491 | C21H20O11 | 448.1006 | 448.1016 | Flavonoids |
|  | 2 | Protocatechuic acid | 6.015 | C7H6O4 | 154.0266 | 154.0260 | Organic acids |
|  | 3 | Leucodelphinidin | 6.613 | C15H14O8 | 322.0689 | 322.0696 | Flavonoids |
|  | 4 | L-2-succinylamino-6-oxoheptanedioic acid | 1.776 | C11H15NO8 | 289.0798 | 289.0803 | Organic acids |
|  | 5 | L-(+)-tartaric acid | 1.164 | C4H6O6 | 150.0164 | 150.0157 | Organic acids |
|  | 6 | Haplopine | 6.820 | C13H11NO4 | 245.0688 | 245.0692 | Alkaloids |
|  | 7 | Glucose 1-phosphate | 1.022 | C6H13O9P | 260.0297 | 260.0297 | Phosphorylated intermediates |
|  | 8 | Furamizole | 1.750 | C12H8N4O5 | 288.0495 | 288.0488 | Alkaloids |
|  | 9 | Dodecanedioic acid | 17.993 | C12H22O4 | 230.1518 | 230.1520 | Fatty acids |
|  | 10 | DL-histidine | 1.076 | C6H9N3O2 | 155.0695 | 155.0688 | Amino acids |
|  | 11 | Citreoisocoumarin | 6.110 | C14H14O6 | 278.079 | 278.0795 | Phenylpropanoids |
|  | 12 | 4-Hydroxy-2-oxoglutaric acid | 1.356 | C5H6O6 | 162.0164 | 162.0157 | Organic acids |
|  | 13 | 3-Hydroxy-L-glutamic acid | 1.213 | C5H9NO5 | 163.0481 | 163.0473 | Amino acids |
|  | 14 | 3-Hydroxy-3-(methoxycarbonyl)pentanedioic acid | 1.306 | C7H10O7 | 206.0426 | 206.0423 | Organic acids |
|  | 15 | 1-O-acetyl-alpha-maltose | 1.603 | C14H24O12 | 384.1268 | 384.1267 | Carbohydrates |
|  | 16 | 1-Methyl-1,2,3,4-tetrahydro-beta-carboline-3-carboxylic acid | 6.620 | C13H14N2O2 | 230.1055 | 230.1057 | Alkaloids |
|  | 17 | 3-Dehydroquinic acid | 1.806 | C7H10O6 | 190.0477 | 190.0474 | Organic acids |
|  | 18 | 1,1-Diethyl-3-oxo-2-triazanolate | 6.902 | C4H10N3O2- | 132.0779 | 132.0779 | Others |
|  | 19 | Uridine-5'-diphosphate-glucose | 1.224 | C15H24N2O17P2 | 566.0550 | 566.0550 | Nucleotides |
| HILIC_pos | 1 | (+)-7-epi-12-hydroxyjasmonoyl-L-isoleucine | 2.214 | C18H29NO5 | 339.2046 | 339.2047 | Amino acid derivative |
|  | 2 | (Z)-12,13-dihydroxyoctadec-9-enoic acid | 1.785 | C18H34O4 | 314.2457 | 314.2458 | Fatty acids |
|  | 3 | (11S,12E,14Z)-11-Hydroxy-12,14-icosadienoic acid | 1.358 | C20H36O3 | 324.2664 | 324.2664 | Fatty acids |
|  | 4 | (15Z)-9,12,13-Trihydroxy-15-octadecenoic acid | 2.291 | C18H34O5 | 330.2406 | 330.2407 | Fatty acids |
|  | 5 | N-(1-Deoxy-1-fructosyl)threonine | 8.354 | C10H19NO8 | 281.1111 | 281.1111 | Amino acid derivative |
|  | 6 | N-(1-Deoxy-1-fructosyl)valine | 7.467 | C11H21NO7 | 279.1318 | 279.1320 | Amino acid derivative |
|  | 7 | N-(1-Deoxy-1-fructosyl)leucine | 6.817 | C12H23NO7 | 293.1475 | 293.1476 | Amino acid derivative |
|  | 8 | (9Z,12Z)-6,8-Dihydroxy-9,12-octadecadienoic acid | 1.657 | C18H32O4 | 312.2301 | 312.2302 | Fatty acids |
|  | 9 | α-Aminoadipic acid | 5.641 | C6H11NO4 | 161.0688 | 161.0688 | Amino acids |
|  | 10 | g-L-Glutamyl-L-pipecolic acid | 3.223 | C11H18N2O5 | 258.1216 | 258.1218 | Organic acids |
|  | 11 | 1-[(3-Carboxypropyl)amino]-1-deoxy-beta-D-fructofuranose | 8.916 | C10H19NO7 | 265.1162 | 265.1163 | Amino acid derivative |
|  | 12 | 1-Stearoyl-sn-glycero-3-phosphoethanolamine | 2.214 | C23H48NO7P | 481.3168 | 481.3169 | Phosphorylated intermediates |
|  | 13 | Eupatolitin 3-O-glucoside | 5.494 | C23H24O13 | 508.1217 | 508.1217 | Flavonoids |
|  | 14 | Genipinic Acid | 1.941 | C11H14O6 | 242.0790 | 242.0790 | Organic acids |
|  | 15 | α-Tocopherol quinone | 1.254 | C29H50O3 | 446.3760 | 446.3761 | Vitamins |
|  | 16 | S-(1,2-Dicarboxyethyl)cysteine | 10.563 | C7H11NO6S | 237.0307 | 237.0308 | Amino acid derivative |
|  | 17 | Glycerophosphatidylethanolamine | 8.885 | C5H14NO6P | 215.0559 | 215.0559 | Phosphorylated intermediates |
|  | 18 | N-acetyl-alpha-fucosamine | 7.305 | C8H15NO5 | 205.095 | 205.0945 | Amines |
|  | 19 | 2-Acetamido-2-deoxy-D-glucono-1,5-lactone | 8.466 | C8H13NO6 | 219.0743 | 219.0744 | Amines |
|  | 20 | 2-Acetamido-2-deoxyglucose | 7.767 | C8H15NO6 | 221.0899 | 221.0899 | Amines |
|  | 21 | 2-Acrylamido-2-methyl-1-propane sulfonic acid | 6.877 | C7H13NO4S | 207.0565 | 207.0564 | Amines |
|  | 22 | 2-Amino-2,3,7-trideoxy-D-lyxo-hept-6-ulosonic acid | 8.051 | C7H13NO5 | 191.0794 | 191.0795 | Organic acids |
|  | 23 | 3-(Butylsulfinyl)-L-alanin | 6.829 | C7H15NO3S | 193.0773 | 193.0772 | Amino acid derivative |
|  | 24 | Sinensin | 8.154 | C21H22O11 | 450.1162 | 450.1163 | Flavonoids |
|  | 25 | 3-Hydroxy-3,5,5-trimethyl-4-(3-oxo-1-buten-1-ylidene)cyclohexyl β-D-glucopyranoside | 2.387 | C19H30O8 | 386.1941 | 386.1942 | Others |
|  | 26 | 4-Methoxybenzaldehyde N-[6-(tert-butyl)thieno[3,2-d]pyrimidin-4-yl]hydrazone | 6.704 | C18H20N4OS | 340.1358 | 340.1373 | Others |
|  | 27 | 4-Pyridoxic acid | 2.216 | C8H9NO4 | 183.0532 | 183.0525 | Organic acids |
|  | 28 | 5,7-Dihydroxy-4-methylcoumarin | 1.817 | C10H8O4 | 192.0423 | 192.0417 | Phenylpropanoids |
|  | 29 | 5'-O-beta-D-Glucosylpyridoxine | 6.700 | C14H21NO8 | 331.1267 | 331.1267 | Others |
|  | 30 | 8-Hydroxy-deoxyguanosine | 7.299 | C10H13N5O5 | 283.0917 | 283.0917 | Nucleotides |
|  | 31 | 8-Hydroxyhexadecanedioic acid | 2.277 | C16H30O5 | 302.2093 | 302.2094 | Fatty acids |
|  | 32 | Acetylarginine | 8.513 | C8H16N4O3 | 216.1222 | 216.1224 | Amino acids |
|  | 33 | Adenosine | 5.085 | C10H13N5O4 | 267.0967 | 267.0969 | Nucleotides |
|  | 34 | Agnuside | 5.841 | C22H26O11 | 466.1475 | 466.1473 | Terpenoids |
|  | 35 | Anticapsin | 2.185 | C9H13NO4 | 199.0845 | 199.0843 | Amino acids |
|  | 36 | Argininosuccinic acid | 9.217 | C10H18N4O6 | 290.1226 | 290.1227 | Amino acids |
|  | 37 | Ascorbyl glucoside | 8.972 | C12H18O11 | 338.0849 | 338.0850 | Others |
|  | 38 | 2-[(2-Amino-3-carboxypropanoyl)amino]-4-methylpentanoic acid | 8.430 | C10H18N2O5 | 246.1216 | 246.1215 | Others |
|  | 39 | Azidamfenicol | 9.539 | C11H13N5O5 | 295.0917 | 295.0904 | Others |
|  | 40 | Betulin | 1.252 | C30H50O2 | 442.3811 | 442.3811 | Terpenoids |
|  | 41 | (10E,15Z)-9,12,13-Trihydroxy-10,15-octadecadienoic acid | 2.210 | C18H32O5 | 328.2250 | 328.2252 | Fatty acids |
|  | 42 | Cytidine | 6.804 | C9H13N3O5 | 243.0855 | 243.0856 | Nucleotides |
|  | 43 | D-(+)-Tryptophan | 6.894 | C11H12N2O2 | 204.0899 | 204.0894 | Amino acids |
|  | 44 | Dammarenediol-II | 1.254 | C30H52O2 | 444.3967 | 444.3967 | Terpenoids |
|  | 45 | Edotecarin | 4.744 | C29H28N4O11 | 608.1755 | 608.1744 | Alkaloids |
|  | 46 | Eglumetad | 6.284 | C8H11NO4 | 185.0688 | 185.0690 | Amino acids |
|  | 47 | Etilevodopa | 2.369 | C11H15NO4 | 225.1001 | 225.1001 | Amino acid derivatives |
|  | 48 | Glycyl-L-leucine | 5.627 | C8H16N2O3 | 188.1161 | 188.1160 | Amino acid derivatives |
|  | 49 | Hexadecanedioic acid | 1.916 | C16H30O4 | 286.2144 | 286.2145 | Fatty acids |
|  | 50 | Jasmonic acid | 2.043 | C12H18O3 | 210.1256 | 210.1251 | Organic acids |
|  | 51 | L-(+)-Citrulline | 9.000 | C6H13N3O3 | 175.0957 | 175.0958 | Amino acids |
|  | 52 | L-Leucyl-L-leucine | 2.284 | C12H24N2O3 | 244.1787 | 244.1788 | Amino acid derivatives |
|  | 53 | L-Leucyl-L-valine | 3.482 | C11H22N2O3 | 230.1630 | 230.1631 | Amino acid derivatives |
|  | 54 | L-Tyrosine | 7.698 | C9H11NO3 | 181.0739 | 181.074 | Amino acids |
|  | 55 | Luteolin | 3.307 | C15H10O6 | 286.0477 | 286.0478 | Flavonoids |
|  | 56 | Mebutamate | 5.447 | C10H20N2O4 | 232.1423 | 232.1423 | Amines |
|  | 57 | Meprobamate | 5.857 | C9H18N2O4 | 218.1267 | 218.1266 | Amines |
|  | 58 | Methyldopa | 8.565 | C10H13NO4 | 211.0845 | 211.0842 | Amino acid derivatives |
|  | 59 | DL-Alanyl-DL-leucine | 4.892 | C9H18N2O3 | 202.1317 | 202.1318 | Amino acid derivatives |
|  | 60 | 2,3-Dinor-8-epi-prostaglandin F2alpha | 2.211 | C18H30O5 | 326.2093 | 326.2095 | Others |
|  | 61 | Muramic acid | 8.987 | C9H17NO7 | 251.1005 | 251.1006 | Organic acids |
|  | 62 | N-(3-Carboxypropanoyl)-5-hydroxynorvaline | 8.450 | C9H15NO6 | 233.0899 | 233.0901 | Amino acid derivatives |
|  | 63 | N2-Succinyl-L-glutamic acid 5-semialdehyde | 2.336 | C9H13NO6 | 231.0743 | 231.0741 | Amino acid derivatives |
|  | 64 | N-Acetyl-DL-glutamic acid | 9.179 | C7H11NO5 | 189.0637 | 189.0633 | Amino acid derivatives |
|  | 65 | N-Acetyl-L-carnosine | 7.057 | C11H16N4O4 | 268.1172 | 268.1159 | Amino acid derivatives |
|  | 66 | N-Acetyl-L-glutamine | 7.590 | C7H12N2O4 | 188.0797 | 188.0796 | Amino acids |
|  | 67 | N-Acetylornithine | 7.928 | C7H14N2O3 | 174.1004 | 174.0997 | Amino acids |
|  | 68 | 5'-N-Ethylcarboxamidoadenosine | 8.182 | C12H16N6O4 | 308.1233 | 308.1220 | Nucleotides |
|  | 69 | N-glycoloyl-D-mannosaminolactone | 1.955 | C8H13NO7 | 235.0692 | 235.0690 | Others |
|  | 70 | Nitrilotriacetic acid | 9.705 | C6H9NO6 | 191.0430 | 191.0430 | Others |
|  | 71 | N-Undecanoylglycine | 2.324 | C13H25NO3 | 243.1834 | 243.1833 | Amino acid derivatives |
|  | 72 | Pantothenic acid | 6.514 | C9H17NO5 | 219.1107 | 219.1104 | Vitamins |
|  | 73 | Pinolenic acid | 1.675 | C18H30O2 | 278.2246 | 278.2248 | Fatty acids |
|  | 74 | Pre-acinetobactin | 2.264 | C16H18N4O5 | 346.1277 | 346.1264 | Others |
|  | 75 | Rutin | 8.315 | C27H30O16 | 610.1534 | 610.1537 | Flavonoids |
|  | 76 | Sulfadimethoxine | 2.027 | C12H14N4O4S | 310.0736 | 310.0737 | Others |
|  | 77 | Troxipide | 4.676 | C15H22N2O4 | 294.1580 | 294.1581 | Amines |
|  | 78 | Uridine monophosphate (UMP) | 9.511 | C9H13N2O9P | 324.0359 | 324.0359 | Nucleotides |
|  | 79 | Ursolic acid | 1.442 | C30H48O3 | 456.3604 | 456.3604 | Terpenoids |
|  | 80 | 2-[(2-Amino-3-methylbutanoyl)amino]-3-hydroxypropanoic acid | 6.545 | C8H16N2O4 | 204.1110 | 204.1106 | Amino acid derivatives |
|  | 81 | Valylvaline | 4.170 | C10H20N2O3 | 216.1474 | 216.1475 | Amino acid derivatives |
|  | 82 | Vorinostat | 2.321 | C14H20N2O3 | 264.1474 | 264.1472 | Amines |
|  | 83 | Zonampanel anhydrous | 8.147 | C13H9N5O6 | 331.0553 | 331.0540 | Alkaloids |
|  | 84 | α,α-Trehalose | 8.683 | C12H22O11 | 342.1162 | 342.1165 | Carbohydrates |
|  | 85 | N-(β-Glucosyl)-(oxindol-3-yl)acetyl-aspartate | 9.424 | C20H22N2O11 | 468.1382 | 468.1382 | Amino acid derivatives |
|  | 86 | 6-O-Benzoylphlorigidoside B | 7.829 | C26H32O14 | 568.1792 | 568.1793 | Others |
|  | 87 | 2-Acetamido-2,6-dideoxy-alpha-D-galactopyranose | 7.834 | C8H15NO5 | 205.0950 | 205.0951 | Carbohydrates |
|  | 88 | 1-(1-Deoxy-D-fructos-1-yl)-L-proline | 7.733 | C11H19NO7 | 277.1162 | 277.1162 | Amino acid derivatives |
| HILIC_neg | 1 | α-Eleostearic acid | 1.393 | C18H30O2 | 278.2246 | 278.2248 | Fatty acids |
|  | 2 | Sucrose | 8.688 | C12H22O11 | 342.1162 | 342.1164 | Carbohydrates |
|  | 3 | Ascorbic acid | 8.939 | C6H8O6 | 176.0321 | 176.0315 | Vitamins |
|  | 4 | Allantoic acid | 9.236 | C4H8N4O4 | 176.0546 | 176.0546 | Amines |

Table S2 Parameters of OPLS-DA

| Compare group | Number of components | *R2X* | *R2Y* | Q2 |
| --- | --- | --- | --- | --- |
| S1-S2 | 1+1+0 | 0.805 | 0.991 | 0.885 |
| S2-S3 | 1+1+0 | 0.783 | 0.993 | 0.944 |
| S3-S4 | 1+1+0 | 0.738 | 0.979 | 0.881 |
| S4-S5 | 1+1+0 | 0.722 | 0.997 | 0.926 |
| S5-S6 | 1+1+0 | 0.699 | 0.999 | 0.923 |
| S6-S7 | 1+1+0 | 0.763 | 1 | 0.987 |
| S7-S8 | 1+2+0 | 0.962 | 0.997 | 0.968 |

Table S3 Differential metabolites pathway analysis

| Pathway name | Metabolite number | P value | FDR | Impact |
| --- | --- | --- | --- | --- |
| Flavonoid biosynthesis | 1 | 2.70E-04 | 3.51E-03 | 1.69E-03 |
| Histidine metabolism | 1 | 5.22E-02 | 2.26E-01 | 4.26E-02 |
| Aminoacyl-tRNA biosynthesis | 1 | 5.22E-02 | 2.26E-01 | 0 |
| Flavone and flavonol biosynthesis | 1 | 2.28E-01 | 6.05E-01 | 1.50E-01 |
| Phenylalanine, tyrosine and tryptophan biosynthesis | 1 | 2.33E-01 | 6.05E-01 | 5.41E-02 |
| Pentose and glucuronate interconversions | 1 | 6.37E-01 | 7.68E-01 | 9.38E-02 |
| Glycerolipid metabolism | 1 | 6.37E-01 | 7.68E-01 | 5.96E-02 |
| Zeatin biosynthesis | 1 | 6.37E-01 | 7.68E-01 | 2.71E-02 |
| Ascorbate and aldarate metabolism | 1 | 6.37E-01 | 7.68E-01 | 0 |
| Amino sugar and nucleotide sugar metabolism | 2 | 6.68E-01 | 7.68E-01 | 1.42-01 |
| Starch and sucrose metabolism | 2 | 7.09E-01 | 7.68E-01 | 1.56E-01 |
| Galactose metabolism | 3 | 7.09E-01 | 7.68E-01 | 7.49E-02 |
| Lysine degradation | 1 | 7.92E-01 | 7.92E-01 | 0 |
